# Supplementary material for: The invalidity of the photo-induced electron transfer mechanism for fluorescein derivatives
Source: Royal Society of Chemistry journal article supplement (doi:10.1039/c2cp42167d), 2012-01-01
Supplement: c2cp42167d.pdf [file c2cp42167d.pdf]

# **Electronic Supplementary Information for**

## **The invalidity of the Photo-induced Electron Transfer Mechanism for Fluorescein Derivatives**

Panwang Zhou, Jianyong Liu, Songqiu Yang, Junsheng Chen, Keli Han<sup>\*</sup>, Guozhong

He

State Key Laboratory of Molecular Reaction Dynamics, Dalian Institute of Chemical  
Physics, Chinese Academy of Science, Dalian 116023, Liaoning, China

Email: [klhan@dipc.ac.cn](mailto:klhan@dipc.ac.cn)

|             | Acidic Condition                                                                           | Alkaline Condition                                                                         |                                                                                              |
|-------------|--------------------------------------------------------------------------------------------|--------------------------------------------------------------------------------------------|----------------------------------------------------------------------------------------------|
| Fluorescein | 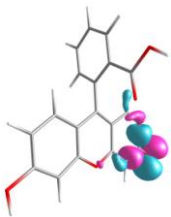<br>H-2   | <br>H-1   | <br>H-3   |
| HPFluorone  | <br>H-2   | <br>H-1   | <br>H-2   |
| 1           | <br>H-3   | <br>H-1   | <br>H-2   |
| 2           | <br>H-1 | <br>H-1 | <br>H-2 |
| 3           | <br>H-1 | <br>H-1 | <br>H-2 |
| 4           | <br>H-1 | <br>H-2 | <br>H-1 |

**Figure S1** Calculated frontier molecular orbitals (MOs) of the neutral and anionic form of the six fluorescein derivatives from DFT/CAM-B3LYP calculations.

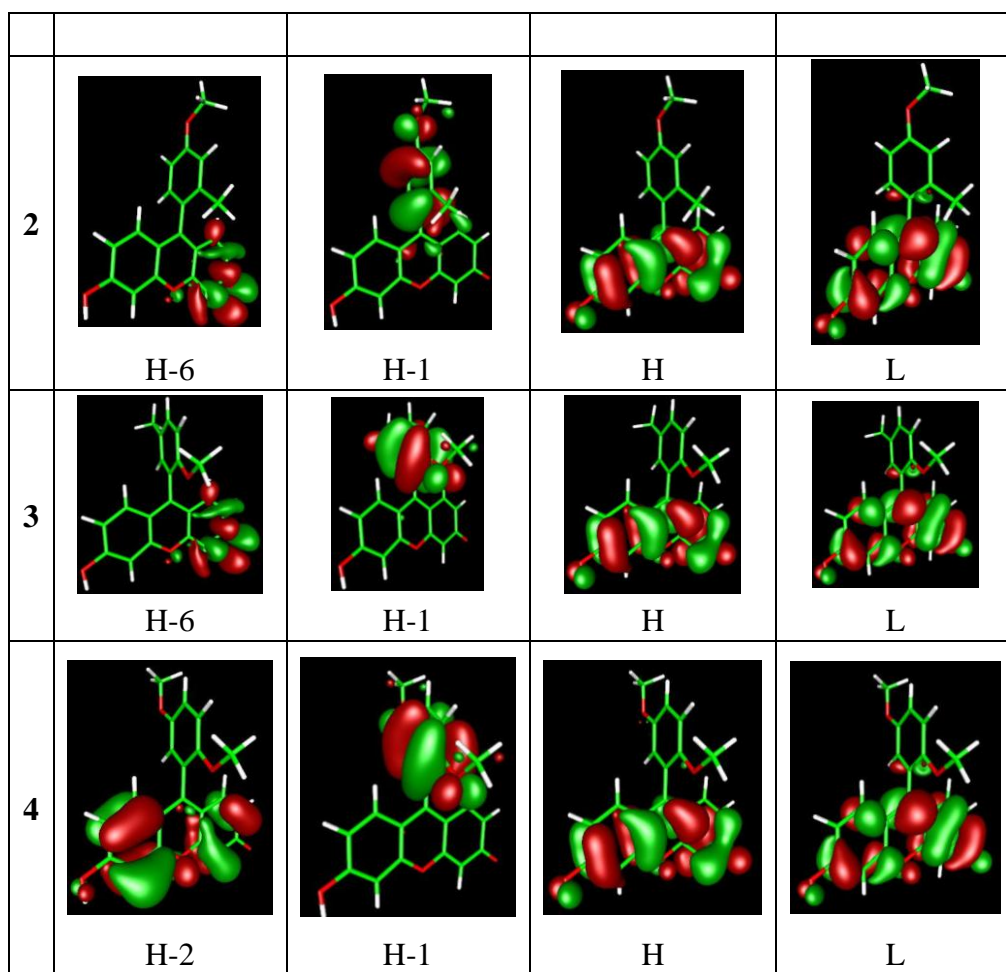

**Figure S2.** Calculated frontier molecular orbitals (MOs) of the neutral form of compounds **2~4** from RI-CC2/TZVP calculations.

**Table S1.** All the optimized geometric coordinates for anionic and neutral form of all the six fluorescein derivatives.

Anionic form of Fluorescein S0 B3LYP/TZVP/IEFPCM

|   |              |              |              |
|---|--------------|--------------|--------------|
| C | -2.914580000 | -2.620178000 | 0.141182000  |
| C | -2.920168000 | -3.245665000 | -1.099232000 |
| C | -1.989212000 | -2.869237000 | -2.062659000 |
| C | -1.058646000 | -1.880851000 | -1.766244000 |
| C | -1.030232000 | -1.264198000 | -0.509321000 |
| C | -1.974955000 | -1.635424000 | 0.463155000  |
| C | -0.012091000 | -0.193156000 | -0.291448000 |
| C | 1.347459000  | -0.523590000 | -0.159036000 |
| C | 2.312100000  | 0.517245000  | -0.008254000 |

|   |              |              |              |
|---|--------------|--------------|--------------|
| O | 1.913789000  | 1.827776000  | -0.009008000 |
| C | 0.597312000  | 2.173537000  | -0.160296000 |
| C | -0.395496000 | 1.158941000  | -0.312109000 |
| C | 0.304998000  | 3.512406000  | -0.163669000 |
| C | -1.043828000 | 3.980800000  | -0.329888000 |
| C | -2.049998000 | 2.944049000  | -0.498816000 |
| C | -1.735265000 | 1.619509000  | -0.490579000 |
| C | 1.856771000  | -1.856451000 | -0.110453000 |
| C | 3.184037000  | -2.119269000 | 0.041035000  |
| C | 4.173188000  | -1.060919000 | 0.175143000  |
| C | 3.653531000  | 0.278711000  | 0.141221000  |
| O | -1.342812000 | 5.205667000  | -0.337526000 |
| C | -2.010558000 | -1.024505000 | 1.869019000  |
| O | 5.401090000  | -1.311796000 | 0.314647000  |
| O | -0.905611000 | -0.830285000 | 2.432996000  |
| O | -3.151783000 | -0.792751000 | 2.343190000  |
| H | -3.648911000 | -2.890825000 | 0.889010000  |
| H | -3.650176000 | -4.016431000 | -1.315928000 |
| H | -1.987881000 | -3.336984000 | -3.039627000 |
| H | -0.342373000 | -1.575200000 | -2.519647000 |
| H | 1.101628000  | 4.236405000  | -0.045525000 |
| H | -3.075593000 | 3.266472000  | -0.636951000 |
| H | -2.515748000 | 0.881503000  | -0.622554000 |
| H | 1.153230000  | -2.674080000 | -0.198582000 |
| H | 3.544048000  | -3.141153000 | 0.074332000  |
| H | 4.338208000  | 1.110887000  | 0.248558000  |

Anionic form of Fluorescein S1 B3LYP/TZVP/IEFPCM

|   |              |              |              |
|---|--------------|--------------|--------------|
| C | -2.916575000 | -2.648890000 | 0.125987000  |
| C | -2.798317000 | -3.417840000 | -1.025799000 |
| C | -1.764804000 | -3.152289000 | -1.921618000 |
| C | -0.872082000 | -2.123290000 | -1.652610000 |
| C | -0.969031000 | -1.345599000 | -0.485709000 |
| C | -2.008730000 | -1.628903000 | 0.426847000  |
| C | -0.002956000 | -0.243947000 | -0.292047000 |
| C | 1.393530000  | -0.505913000 | -0.131019000 |
| C | 2.317202000  | 0.571312000  | -0.004426000 |
| O | 1.888993000  | 1.878400000  | -0.036696000 |
| C | 0.551350000  | 2.166585000  | -0.186458000 |
| C | -0.414107000 | 1.127300000  | -0.316850000 |
| C | 0.224923000  | 3.501219000  | -0.216419000 |
| C | -1.134939000 | 3.939473000  | -0.398182000 |
| C | -2.113015000 | 2.882538000  | -0.554612000 |
| C | -1.759575000 | 1.559382000  | -0.518213000 |

|   |              |              |              |
|---|--------------|--------------|--------------|
| C | 1.955847000  | -1.814187000 | -0.021725000 |
| C | 3.298826000  | -2.029627000 | 0.141441000  |
| C | 4.242337000  | -0.934445000 | 0.236349000  |
| C | 3.668601000  | 0.384534000  | 0.159304000  |
| O | -1.450392000 | 5.164965000  | -0.428231000 |
| C | -2.157398000 | -0.913743000 | 1.773391000  |
| O | 5.484806000  | -1.121598000 | 0.387819000  |
| O | -1.110057000 | -0.748196000 | 2.448386000  |
| O | -3.325900000 | -0.589138000 | 2.108978000  |
| H | -3.721518000 | -2.841153000 | 0.824581000  |
| H | -3.506639000 | -4.213185000 | -1.225266000 |
| H | -1.662722000 | -3.732651000 | -2.830956000 |
| H | -0.087453000 | -1.898104000 | -2.365608000 |
| H | 1.005070000  | 4.245203000  | -0.113026000 |
| H | -3.145771000 | 3.173037000  | -0.709137000 |
| H | -2.522034000 | 0.802592000  | -0.644649000 |
| H | 1.283587000  | -2.660220000 | -0.073612000 |
| H | 3.690186000  | -3.037203000 | 0.221788000  |
| H | 4.321159000  | 1.244212000  | 0.248041000  |

Neutral form of Fluorescein S0 B3LYP/TZVP/IEFPCM

|   |              |              |              |
|---|--------------|--------------|--------------|
| C | -3.874283000 | -0.678885000 | 0.025863000  |
| C | -4.259981000 | -0.654825000 | -1.305990000 |
| C | -3.313252000 | -0.399600000 | -2.291242000 |
| C | -1.987888000 | -0.170726000 | -1.939339000 |
| C | -1.582981000 | -0.191785000 | -0.603874000 |
| C | -2.542487000 | -0.452581000 | 0.393982000  |
| C | -0.135515000 | 0.057147000  | -0.328428000 |
| C | 0.770927000  | -1.051871000 | -0.271260000 |
| C | 2.141105000  | -0.794294000 | -0.074453000 |
| O | 2.610007000  | 0.475341000  | 0.045683000  |
| C | 1.770846000  | 1.551967000  | -0.033679000 |
| C | 0.358858000  | 1.341753000  | -0.238158000 |
| C | 2.326971000  | 2.788208000  | 0.084364000  |
| C | 1.510936000  | 3.976874000  | 0.021305000  |
| C | 0.075504000  | 3.762250000  | -0.177272000 |
| C | -0.457057000 | 2.525953000  | -0.295622000 |
| C | 0.381176000  | -2.403813000 | -0.386353000 |
| C | 1.298082000  | -3.424350000 | -0.308352000 |
| C | 2.657894000  | -3.127566000 | -0.107110000 |
| C | 3.084121000  | -1.809599000 | 0.004964000  |
| O | 1.987271000  | 5.125723000  | 0.127316000  |
| C | -2.154730000 | -0.478995000 | 1.830679000  |
| O | 3.508732000  | -4.178997000 | -0.034359000 |

|   |              |              |              |
|---|--------------|--------------|--------------|
| O | -1.030503000 | -0.312691000 | 2.252469000  |
| O | -3.198490000 | -0.712848000 | 2.653332000  |
| H | -4.606429000 | -0.873504000 | 0.795865000  |
| H | -5.293726000 | -0.832845000 | -1.572198000 |
| H | -3.601913000 | -0.376770000 | -3.334433000 |
| H | -1.253646000 | 0.027978000  | -2.709583000 |
| H | 3.393581000  | 2.893522000  | 0.233165000  |
| H | -0.550041000 | 4.645248000  | -0.223890000 |
| H | -1.522313000 | 2.404472000  | -0.440847000 |
| H | -0.662858000 | -2.638475000 | -0.541285000 |
| H | 0.993589000  | -4.458400000 | -0.396169000 |
| H | 4.126557000  | -1.559368000 | 0.155794000  |
| H | 4.415904000  | -3.879396000 | 0.113174000  |
| H | -2.864315000 | -0.716262000 | 3.564729000  |

Neutral form of Fluorescein S1(121.04) B3LYP/TZVP/IEFPCM

|   |              |              |              |
|---|--------------|--------------|--------------|
| C | -3.186058000 | -2.360120000 | -0.012065000 |
| C | -3.084814000 | -3.108411000 | -1.173301000 |
| C | -1.969269000 | -2.952401000 | -1.994190000 |
| C | -0.979180000 | -2.042458000 | -1.654605000 |
| C | -1.066808000 | -1.253660000 | -0.496566000 |
| C | -2.190901000 | -1.440929000 | 0.348619000  |
| C | -0.016643000 | -0.246041000 | -0.270911000 |
| C | 1.329682000  | -0.620984000 | -0.112760000 |
| C | 2.339647000  | 0.385186000  | 0.034970000  |
| O | 2.017110000  | 1.703952000  | 0.016574000  |
| C | 0.726609000  | 2.095110000  | -0.163582000 |
| C | -0.320146000 | 1.179299000  | -0.310941000 |
| C | 0.537411000  | 3.474973000  | -0.212594000 |
| C | -0.783037000 | 4.038671000  | -0.433400000 |
| C | -1.847835000 | 3.082547000  | -0.610593000 |
| C | -1.610222000 | 1.735298000  | -0.551141000 |
| C | 1.792336000  | -1.968670000 | -0.010798000 |
| C | 3.117761000  | -2.268414000 | 0.159658000  |
| C | 4.079443000  | -1.237554000 | 0.264779000  |
| C | 3.681897000  | 0.091403000  | 0.209428000  |
| O | -0.944968000 | 5.284956000  | -0.466564000 |
| C | -2.274920000 | -0.756149000 | 1.659371000  |
| O | 5.368004000  | -1.619120000 | 0.431484000  |
| O | -1.387817000 | -0.100577000 | 2.168692000  |
| O | -3.462752000 | -0.940937000 | 2.283077000  |
| H | -4.036433000 | -2.493737000 | 0.640930000  |
| H | -3.865098000 | -3.811321000 | -1.434707000 |
| H | -1.876635000 | -3.529368000 | -2.905832000 |

|   |              |              |              |
|---|--------------|--------------|--------------|
| H | -0.133829000 | -1.902713000 | -2.316037000 |
| H | 1.382608000  | 4.139165000  | -0.093270000 |
| H | -2.844713000 | 3.462411000  | -0.794074000 |
| H | -2.437309000 | 1.053033000  | -0.698105000 |
| H | 1.071979000  | -2.771427000 | -0.066550000 |
| H | 3.448093000  | -3.296202000 | 0.234690000  |
| H | 4.392165000  | 0.902416000  | 0.309093000  |
| H | 5.949505000  | -0.849415000 | 0.500829000  |
| H | -3.416681000 | -0.489215000 | 3.140684000  |

Neutral form of Fluorescein S1(67.07) B3LYP/TZVP/IEFPCM

|   |              |              |              |
|---|--------------|--------------|--------------|
| C | -3.836048000 | -0.967404000 | -0.034178000 |
| C | -4.308041000 | -0.602941000 | -1.285018000 |
| C | -3.445159000 | 0.005448000  | -2.193854000 |
| C | -2.120134000 | 0.232559000  | -1.848761000 |
| C | -1.614131000 | -0.142634000 | -0.596750000 |
| C | -2.503973000 | -0.731212000 | 0.331077000  |
| C | -0.173176000 | 0.055443000  | -0.341470000 |
| C | 0.715673000  | -1.026607000 | -0.217485000 |
| C | 2.115886000  | -0.779868000 | -0.034479000 |
| O | 2.598696000  | 0.490386000  | 0.003900000  |
| C | 1.760025000  | 1.551837000  | -0.119447000 |
| C | 0.378779000  | 1.398181000  | -0.290249000 |
| C | 2.378254000  | 2.799139000  | -0.050754000 |
| C | 1.598671000  | 4.024865000  | -0.139461000 |
| C | 0.176117000  | 3.850443000  | -0.284425000 |
| C | -0.384982000 | 2.601079000  | -0.345311000 |
| C | 0.344727000  | -2.401843000 | -0.296970000 |
| C | 1.266075000  | -3.408560000 | -0.170740000 |
| C | 2.632452000  | -3.111874000 | 0.038163000  |
| C | 3.054242000  | -1.790390000 | 0.095019000  |
| O | 2.171077000  | 5.142255000  | -0.080967000 |
| C | -2.079386000 | -1.016521000 | 1.727931000  |
| O | 3.474046000  | -4.166824000 | 0.162455000  |
| O | -1.147257000 | -0.495942000 | 2.303142000  |
| O | -2.874004000 | -1.924349000 | 2.338830000  |
| H | -4.504821000 | -1.421762000 | 0.682901000  |
| H | -5.341575000 | -0.786858000 | -1.548312000 |
| H | -3.800291000 | 0.292644000  | -3.175665000 |
| H | -1.448756000 | 0.680372000  | -2.570620000 |
| H | 3.450205000  | 2.863250000  | 0.078102000  |
| H | -0.441538000 | 4.738083000  | -0.331587000 |
| H | -1.459150000 | 2.512663000  | -0.441793000 |
| H | -0.691802000 | -2.653721000 | -0.469704000 |

|   |              |              |              |
|---|--------------|--------------|--------------|
| H | 0.964454000  | -4.446006000 | -0.233475000 |
| H | 4.096521000  | -1.531100000 | 0.232500000  |
| H | 4.382057000  | -3.868535000 | 0.309190000  |
| H | -2.571452000 | -2.012859000 | 3.257139000  |

Anionic form of HPFluorone S0 B3LYP/TZVP/IEFPCM

|   |              |              |              |
|---|--------------|--------------|--------------|
| C | 0.000042000  | 4.712453000  | 0.000000000  |
| C | -0.270188000 | 4.013164000  | 1.172992000  |
| C | -0.273645000 | 2.621464000  | 1.173019000  |
| C | 0.000018000  | 1.912715000  | 0.000008000  |
| C | 0.273698000  | 2.621453000  | -1.173006000 |
| C | 0.270262000  | 4.013153000  | -1.172987000 |
| C | 0.000003000  | 0.420428000  | 0.000013000  |
| C | -1.214622000 | -0.284227000 | -0.008433000 |
| C | -1.195571000 | -1.713468000 | -0.009515000 |
| O | -0.000023000 | -2.381861000 | 0.000109000  |
| C | 1.195538000  | -1.713489000 | 0.009590000  |
| C | 1.214614000  | -0.284248000 | 0.008466000  |
| C | 2.333425000  | -2.474666000 | 0.019936000  |
| C | 3.636981000  | -1.866432000 | 0.042939000  |
| C | 3.650870000  | -0.410979000 | 0.055994000  |
| C | 2.506545000  | 0.324962000  | 0.042792000  |
| C | -2.506542000 | 0.325005000  | -0.042810000 |
| C | -3.650878000 | -0.410917000 | -0.056065000 |
| C | -3.637013000 | -1.866372000 | -0.043126000 |
| C | -2.333469000 | -2.474626000 | -0.019926000 |
| O | 4.700505000  | -2.540555000 | 0.054632000  |
| O | -4.700550000 | -2.540476000 | -0.054654000 |
| H | 0.000051000  | 5.795466000  | -0.000002000 |
| H | -0.479201000 | 4.549906000  | 2.090273000  |
| H | -0.485342000 | 2.081572000  | 2.087978000  |
| H | 0.485385000  | 2.081553000  | -2.087962000 |
| H | 0.479284000  | 4.549887000  | -2.090271000 |
| H | 2.258716000  | -3.554882000 | 0.019127000  |
| H | 4.619069000  | 0.075265000  | 0.082368000  |
| H | 2.561708000  | 1.405789000  | 0.056731000  |
| H | -2.561687000 | 1.405833000  | -0.056727000 |
| H | -4.619070000 | 0.075343000  | -0.082440000 |
| H | -2.258778000 | -3.554843000 | -0.019051000 |

Anionic form of HPFluorone S1(52.86) B3LYP/TZVP/IEFPCM

|   |              |             |              |
|---|--------------|-------------|--------------|
| C | 0.000269000  | 4.768776000 | -0.000008000 |
| C | -0.741608000 | 4.062310000 | 0.945884000  |
| C | -0.744697000 | 2.673679000 | 0.945241000  |



|   |              |              |              |
|---|--------------|--------------|--------------|
| C | 0.000101000  | 1.940021000  | 0.000008000  |
| C | 0.744990000  | 2.673579000  | -0.945229000 |
| C | 0.742065000  | 4.062211000  | -0.945891000 |
| C | 0.000019000  | 0.472613000  | 0.000020000  |
| C | -1.224405000 | -0.280523000 | -0.023348000 |
| C | -1.192116000 | -1.704643000 | -0.009797000 |
| O | -0.000129000 | -2.388142000 | 0.000023000  |
| C | 1.191928000  | -1.704767000 | 0.009834000  |
| C | 1.224363000  | -0.280650000 | 0.023387000  |
| C | 2.324435000  | -2.483526000 | 0.026156000  |
| C | 3.638343000  | -1.899114000 | 0.084209000  |
| C | 3.670526000  | -0.451125000 | 0.152479000  |
| C | 2.525847000  | 0.298215000  | 0.131014000  |
| C | -2.525826000 | 0.298470000  | -0.131048000 |
| C | -3.670582000 | -0.450753000 | -0.152520000 |
| C | -3.638553000 | -1.898738000 | -0.084109000 |
| C | -2.324703000 | -2.483286000 | -0.026116000 |
| O | 4.690153000  | -2.599147000 | 0.092162000  |
| O | -4.690426000 | -2.598674000 | -0.092281000 |
| H | 0.000334000  | 5.851601000  | -0.000015000 |
| H | -1.314472000 | 4.596442000  | 1.694801000  |
| H | -1.309278000 | 2.144276000  | 1.702509000  |
| H | 1.309515000  | 2.144100000  | -1.702487000 |
| H | 1.314994000  | 4.596266000  | -1.694812000 |
| H | 2.230939000  | -3.562153000 | 0.012409000  |
| H | 4.639724000  | 0.026724000  | 0.235548000  |
| H | 2.601969000  | 1.374216000  | 0.200857000  |
| H | -2.601836000 | 1.374475000  | -0.200955000 |
| H | -4.639727000 | 0.027188000  | -0.235680000 |
| H | -2.231316000 | -3.561923000 | -0.012401000 |

Anionic form of HPFluorone S1(127.17) B3LYP/TZVP/IEFPCM

|   |              |              |              |
|---|--------------|--------------|--------------|
| C | 0.000254000  | 4.768857000  | -0.000020000 |
| C | 0.669873000  | 4.062264000  | 0.998250000  |
| C | 0.672865000  | 2.673648000  | 0.997821000  |
| C | 0.000105000  | 1.939980000  | -0.000019000 |
| C | -0.672579000 | 2.673717000  | -0.997859000 |
| C | -0.669440000 | 4.062333000  | -0.998288000 |
| C | 0.000027000  | 0.472672000  | -0.000016000 |
| C | -1.222720000 | -0.280541000 | -0.067975000 |
| C | -1.189516000 | -1.704646000 | -0.079056000 |
| O | -0.000126000 | -2.388159000 | 0.000010000  |
| C | 1.189338000  | -1.704772000 | 0.079056000  |
| C | 1.222695000  | -0.280671000 | 0.067947000  |

|   |              |              |              |
|---|--------------|--------------|--------------|
| C | 2.319905000  | -2.483548000 | 0.147234000  |
| C | 3.634494000  | -1.899168000 | 0.187104000  |
| C | 3.671675000  | -0.451169000 | 0.121358000  |
| C | 2.528586000  | 0.298162000  | 0.057452000  |
| C | -2.528550000 | 0.298431000  | -0.057478000 |
| C | -3.671719000 | -0.450779000 | -0.121376000 |
| C | -3.634691000 | -1.898781000 | -0.187142000 |
| C | -2.320166000 | -2.483302000 | -0.147230000 |
| O | 4.683974000  | -2.599201000 | 0.257364000  |
| O | -4.684249000 | -2.598705000 | -0.257324000 |
| H | 0.000310000  | 5.851677000  | -0.000020000 |
| H | 1.185694000  | 4.596298000  | 1.787609000  |
| H | 1.179656000  | 2.144238000  | 1.794918000  |
| H | -1.179426000 | 2.144361000  | -1.794954000 |
| H | -1.185206000 | 4.596421000  | -1.787647000 |
| H | 2.225601000  | -3.562172000 | 0.153990000  |
| H | 4.644355000  | 0.026705000  | 0.110629000  |
| H | 2.609760000  | 1.374154000  | -0.006650000 |
| H | -2.609609000 | 1.374432000  | 0.006622000  |
| H | -4.644348000 | 0.027198000  | -0.110633000 |
| H | -2.225978000 | -3.561936000 | -0.153954000 |

Neutral form of HPFluorone S0 B3LYP/TZVP/IEFPCM

|   |              |              |              |
|---|--------------|--------------|--------------|
| C | -0.847669000 | 4.656994000  | 0.003842000  |
| C | -0.362275000 | 4.032461000  | -1.141869000 |
| C | -0.125640000 | 2.661864000  | -1.144550000 |
| C | -0.385164000 | 1.898804000  | -0.001791000 |
| C | -0.875210000 | 2.531248000  | 1.144494000  |
| C | -1.100878000 | 3.904174000  | 1.146674000  |
| C | -0.135244000 | 0.430891000  | -0.004636000 |
| C | 1.214286000  | -0.058761000 | 0.009401000  |
| C | 1.431051000  | -1.451656000 | 0.007370000  |
| O | 0.392515000  | -2.326800000 | -0.007668000 |
| C | -0.903259000 | -1.891155000 | -0.017114000 |
| C | -1.179515000 | -0.474234000 | -0.016789000 |
| C | -1.879215000 | -2.838883000 | -0.025067000 |
| C | -3.273469000 | -2.467214000 | -0.053428000 |
| C | -3.554345000 | -1.029735000 | -0.075888000 |
| C | -2.570538000 | -0.103540000 | -0.064299000 |
| C | 2.360652000  | 0.766105000  | 0.056393000  |
| C | 3.628252000  | 0.235973000  | 0.075500000  |
| C | 3.802526000  | -1.159073000 | 0.057825000  |
| C | 2.702301000  | -2.007301000 | 0.024470000  |
| O | -4.193834000 | -3.309910000 | -0.063659000 |

|   |              |              |              |
|---|--------------|--------------|--------------|
| O | 5.076045000  | -1.618562000 | 0.078658000  |
| H | -1.027409000 | 5.724854000  | 0.005739000  |
| H | -0.166420000 | 4.611467000  | -2.035785000 |
| H | 0.251532000  | 2.180934000  | -2.038719000 |
| H | -1.073183000 | 1.949219000  | 2.036088000  |
| H | -1.475891000 | 4.383727000  | 2.042268000  |
| H | -1.617857000 | -3.888969000 | -0.022782000 |
| H | -4.595819000 | -0.734404000 | -0.113204000 |
| H | -2.814499000 | 0.949595000  | -0.090389000 |
| H | 2.232912000  | 1.838953000  | 0.076785000  |
| H | 4.500820000  | 0.874028000  | 0.110990000  |
| H | 2.815362000  | -3.083870000 | 0.020155000  |
| H | 5.092770000  | -2.585132000 | 0.066980000  |

Neutral form of HPFluorone S1(56.35) B3LYP/TZVP/IEFPCM

|   |              |              |              |
|---|--------------|--------------|--------------|
| C | 0.000150000  | 4.758466000  | 0.012117000  |
| C | -0.622176000 | 4.054403000  | 1.039688000  |
| C | -0.630056000 | 2.664647000  | 1.032932000  |
| C | -0.009171000 | 1.943772000  | -0.001029000 |
| C | 0.624233000  | 2.669690000  | -1.024409000 |
| C | 0.620846000  | 4.058491000  | -1.020928000 |
| C | -0.018251000 | 0.472153000  | -0.011595000 |
| C | -1.218813000 | -0.264786000 | 0.032390000  |
| C | -1.180167000 | -1.698259000 | 0.031895000  |
| O | 0.005349000  | -2.362679000 | -0.016034000 |
| C | 1.178115000  | -1.678481000 | -0.060739000 |
| C | 1.232495000  | -0.279717000 | -0.063786000 |
| C | 2.317952000  | -2.482081000 | -0.091568000 |
| C | 3.647421000  | -1.893770000 | -0.107580000 |
| C | 3.689659000  | -0.454986000 | -0.074012000 |
| C | 2.539558000  | 0.291111000  | -0.045952000 |
| C | -2.529139000 | 0.303158000  | 0.016097000  |
| C | -3.658546000 | -0.473160000 | 0.050321000  |
| C | -3.562737000 | -1.881900000 | 0.086259000  |
| C | -2.315250000 | -2.490937000 | 0.069715000  |
| O | 4.665485000  | -2.631272000 | -0.141148000 |
| O | -4.727057000 | -2.576028000 | 0.121758000  |
| H | 0.004454000  | 5.841285000  | 0.016885000  |
| H | -1.098344000 | 4.587796000  | 1.853361000  |
| H | -1.102061000 | 2.129043000  | 1.847099000  |
| H | 1.099698000  | 2.139687000  | -1.840279000 |
| H | 1.101520000  | 4.596364000  | -1.828984000 |
| H | 2.216390000  | -3.558878000 | -0.095209000 |
| H | 4.660037000  | 0.024574000  | -0.062043000 |

|   |              |              |              |
|---|--------------|--------------|--------------|
| H | 2.619801000  | 1.368760000  | -0.006040000 |
| H | -2.629421000 | 1.377068000  | -0.030568000 |
| H | -4.641111000 | -0.019690000 | 0.034374000  |
| H | -2.208435000 | -3.568501000 | 0.072962000  |
| H | -4.558518000 | -3.528081000 | 0.133389000  |

Neutral form of HPFluorone S1(123.79) B3LYP/TZVP/IEFPCM

|   |              |              |              |
|---|--------------|--------------|--------------|
| C | -0.874008000 | 4.699361000  | 0.008915000  |
| C | -1.347771000 | 3.902006000  | -1.031365000 |
| C | -1.105175000 | 2.534551000  | -1.033688000 |
| C | -0.366306000 | 1.930791000  | -0.001697000 |
| C | 0.103996000  | 2.748766000  | 1.039445000  |
| C | -0.149922000 | 4.115155000  | 1.044925000  |
| C | -0.096673000 | 0.484064000  | -0.010821000 |
| C | 1.214787000  | -0.028709000 | 0.048727000  |
| C | 1.430620000  | -1.446312000 | 0.049441000  |
| O | 0.382141000  | -2.310109000 | -0.011988000 |
| C | -0.892553000 | -1.844371000 | -0.072208000 |
| C | -1.193769000 | -0.477355000 | -0.077794000 |
| C | -1.871609000 | -2.837024000 | -0.116176000 |
| C | -3.283872000 | -2.493491000 | -0.149532000 |
| C | -3.580733000 | -1.084940000 | -0.118466000 |
| C | -2.581351000 | -0.146988000 | -0.077106000 |
| C | 2.403881000  | 0.762401000  | 0.047791000  |
| C | 3.652423000  | 0.198330000  | 0.096645000  |
| C | 3.807188000  | -1.205161000 | 0.133011000  |
| C | 2.687589000  | -2.025517000 | 0.101889000  |
| O | -4.154765000 | -3.399602000 | -0.194778000 |
| O | 5.075533000  | -1.682094000 | 0.183425000  |
| H | -1.070014000 | 5.764302000  | 0.012682000  |
| H | -1.905773000 | 4.347414000  | -1.845956000 |
| H | -1.468848000 | 1.929900000  | -1.855126000 |
| H | 0.653054000  | 2.304043000  | 1.859994000  |
| H | 0.213946000  | 4.723273000  | 1.864133000  |
| H | -1.580907000 | -3.878824000 | -0.117143000 |
| H | -4.620806000 | -0.784944000 | -0.119312000 |
| H | -2.851620000 | 0.899402000  | -0.039673000 |
| H | 2.312873000  | 1.837133000  | 0.001116000  |
| H | 4.539255000  | 0.818676000  | 0.092211000  |
| H | 2.773283000  | -3.104964000 | 0.105068000  |
| H | 5.078172000  | -2.648950000 | 0.194504000  |

Anionic form of Complex 1 S0 B3LYP/TZVP/IEFPCM

|   |             |             |             |
|---|-------------|-------------|-------------|
| C | 0.001886000 | 3.983172000 | 0.834292000 |
|---|-------------|-------------|-------------|

|   |              |              |              |
|---|--------------|--------------|--------------|
| C | 0.001971000  | 4.597764000  | -0.413774000 |
| C | 0.001405000  | 3.820483000  | -1.566458000 |
| C | 0.000774000  | 2.434000000  | -1.456700000 |
| C | 0.000703000  | 1.813109000  | -0.205517000 |
| C | 0.001252000  | 2.592103000  | 0.965637000  |
| C | 0.000090000  | 0.319377000  | -0.140189000 |
| C | -1.213795000 | -0.384738000 | -0.116346000 |
| C | -1.196319000 | -1.812267000 | -0.052102000 |
| O | -0.001052000 | -2.480853000 | -0.023860000 |
| C | 1.194758000  | -1.813242000 | -0.052129000 |
| C | 1.213399000  | -0.385733000 | -0.116385000 |
| C | 2.333388000  | -2.572855000 | -0.020642000 |
| C | 3.636400000  | -1.963229000 | -0.040899000 |
| C | 3.649578000  | -0.508834000 | -0.104989000 |
| C | 2.504317000  | 0.225066000  | -0.137711000 |
| C | -2.504208000 | 0.227126000  | -0.137529000 |
| C | -3.650069000 | -0.505833000 | -0.104770000 |
| C | -3.638079000 | -1.960242000 | -0.040801000 |
| C | -2.335572000 | -2.570946000 | -0.020612000 |
| O | 4.700777000  | -2.635369000 | -0.007203000 |
| C | 0.001181000  | 1.958804000  | 2.334239000  |
| O | -4.703009000 | -2.631503000 | -0.007093000 |
| H | 0.002314000  | 4.593734000  | 1.730004000  |
| H | 0.002464000  | 5.678778000  | -0.483273000 |
| H | 0.001452000  | 4.286089000  | -2.544218000 |
| H | 0.000340000  | 1.821912000  | -2.350839000 |
| H | 2.260204000  | -3.652172000 | 0.026029000  |
| H | 4.617878000  | -0.022347000 | -0.123011000 |
| H | 2.556491000  | 1.305531000  | -0.184639000 |
| H | -2.555490000 | 1.307637000  | -0.184376000 |
| H | -4.617966000 | -0.018543000 | -0.122664000 |
| H | -2.263294000 | -3.650327000 | 0.026032000  |
| H | 0.001153000  | 2.721399000  | 3.112783000  |
| H | -0.876993000 | 1.325799000  | 2.481821000  |
| H | 0.879346000  | 1.325798000  | 2.481906000  |

Anionic form of Complex **1** S1(71.78) B3LYP/TZVP/IEFPCM

|   |              |             |              |
|---|--------------|-------------|--------------|
| C | -0.254389000 | 4.025337000 | 0.802708000  |
| C | 0.074328000  | 4.630143000 | -0.406159000 |
| C | 0.412338000  | 3.838962000 | -1.500120000 |
| C | 0.408593000  | 2.455605000 | -1.371577000 |
| C | 0.065967000  | 1.831683000 | -0.162665000 |
| C | -0.262335000 | 2.635842000 | 0.951355000  |
| C | 0.059132000  | 0.352120000 | -0.087592000 |

|   |              |              |              |
|---|--------------|--------------|--------------|
| C | -1.166658000 | -0.381297000 | -0.003914000 |
| C | -1.146611000 | -1.804429000 | 0.055639000  |
| O | 0.041906000  | -2.496620000 | 0.023932000  |
| C | 1.234973000  | -1.824825000 | -0.114676000 |
| C | 1.271911000  | -0.400580000 | -0.167685000 |
| C | 2.362963000  | -2.605015000 | -0.184624000 |
| C | 3.675554000  | -2.021628000 | -0.298553000 |
| C | 3.713614000  | -0.572812000 | -0.328709000 |
| C | 2.572569000  | 0.181621000  | -0.258836000 |
| C | -2.461127000 | 0.220914000  | -0.013376000 |
| C | -3.615354000 | -0.512411000 | 0.067281000  |
| C | -3.595649000 | -1.958706000 | 0.157234000  |
| C | -2.287832000 | -2.564699000 | 0.137102000  |
| O | 4.723509000  | -2.726628000 | -0.360106000 |
| C | -0.591221000 | 2.027478000  | 2.290728000  |
| O | -4.653962000 | -2.646280000 | 0.236833000  |
| H | -0.499882000 | 4.644393000  | 1.658559000  |
| H | 0.072739000  | 5.710203000  | -0.489949000 |
| H | 0.671940000  | 4.294238000  | -2.448277000 |
| H | 0.662040000  | 1.838242000  | -2.225477000 |
| H | 2.272199000  | -3.683160000 | -0.139172000 |
| H | 4.685630000  | -0.098118000 | -0.396469000 |
| H | 2.644596000  | 1.261130000  | -0.276350000 |
| H | -2.517547000 | 1.299086000  | -0.092819000 |
| H | -4.582258000 | -0.023041000 | 0.060163000  |
| H | -2.211730000 | -3.644046000 | 0.178904000  |
| H | -0.594357000 | 2.788915000  | 3.070999000  |
| H | -1.575103000 | 1.550266000  | 2.287182000  |
| H | 0.132422000  | 1.256705000  | 2.564145000  |

Anionic form of Complex **1** S1(111.61) B3LYP/TZVP/IEFPCM

|   |              |              |              |
|---|--------------|--------------|--------------|
| C | 0.332286000  | 4.020706000  | 0.790833000  |
| C | -0.029414000 | 4.627383000  | -0.407639000 |
| C | -0.404510000 | 3.838114000  | -1.490842000 |
| C | -0.404407000 | 2.454752000  | -1.362342000 |
| C | -0.028953000 | 1.828862000  | -0.164230000 |
| C | 0.337153000  | 2.631184000  | 0.939307000  |
| C | -0.028063000 | 0.349304000  | -0.089083000 |
| C | -1.246753000 | -0.396799000 | -0.132926000 |
| C | -1.216033000 | -1.821199000 | -0.079820000 |
| O | -0.023135000 | -2.499404000 | 0.024701000  |
| C | 1.169599000  | -1.813790000 | 0.019731000  |
| C | 1.195676000  | -0.390859000 | -0.041769000 |
| C | 2.308549000  | -2.580337000 | 0.066979000  |

|   |              |              |              |
|---|--------------|--------------|--------------|
| C | 3.619714000  | -1.981572000 | 0.047543000  |
| C | 3.644643000  | -0.535478000 | -0.044572000 |
| C | 2.492551000  | 0.204171000  | -0.090795000 |
| C | -2.546369000 | 0.192410000  | -0.186465000 |
| C | -3.693018000 | -0.555840000 | -0.222221000 |
| C | -3.661980000 | -2.004850000 | -0.192201000 |
| C | -2.349818000 | -2.595285000 | -0.116023000 |
| O | 4.676127000  | -2.674886000 | 0.096270000  |
| C | 0.702810000  | 2.020970000  | 2.268276000  |
| O | -4.715117000 | -2.704150000 | -0.222663000 |
| H | 0.606842000  | 4.638348000  | 1.638839000  |
| H | -0.024456000 | 5.707421000  | -0.491575000 |
| H | -0.690092000 | 4.294878000  | -2.430782000 |
| H | -0.686820000 | 1.838844000  | -2.208165000 |
| H | 2.227761000  | -3.659206000 | 0.112173000  |
| H | 4.613549000  | -0.051438000 | -0.081238000 |
| H | 2.552488000  | 1.281953000  | -0.172968000 |
| H | -2.612999000 | 1.272279000  | -0.202673000 |
| H | -4.664029000 | -0.075927000 | -0.261887000 |
| H | -2.263591000 | -3.673873000 | -0.072338000 |
| H | 0.735222000  | 2.782630000  | 3.047658000  |
| H | -0.017524000 | 1.255400000  | 2.564184000  |
| H | 1.682720000  | 1.536813000  | 2.234787000  |

Neutral form of Complex 1 S0 B3LYP/TZVP/IEFPCM

|   |              |              |              |
|---|--------------|--------------|--------------|
| C | 1.101369000  | 3.853807000  | 0.824135000  |
| C | 1.238476000  | 4.444147000  | -0.427658000 |
| C | 1.021552000  | 3.691114000  | -1.576002000 |
| C | 0.668632000  | 2.351508000  | -1.458796000 |
| C | 0.532863000  | 1.756051000  | -0.202487000 |
| C | 0.748515000  | 2.509262000  | 0.965389000  |
| C | 0.145477000  | 0.315682000  | -0.131145000 |
| C | -1.243079000 | -0.042109000 | -0.103992000 |
| C | -1.592385000 | -1.406265000 | -0.047717000 |
| O | -0.641515000 | -2.376332000 | -0.024135000 |
| C | 0.690176000  | -2.066291000 | -0.052400000 |
| C | 1.097732000  | -0.682997000 | -0.111920000 |
| C | 1.574257000  | -3.099797000 | -0.028960000 |
| C | 2.997339000  | -2.857491000 | -0.050213000 |
| C | 3.411068000  | -1.452922000 | -0.109389000 |
| C | 2.516954000  | -0.440472000 | -0.135529000 |
| C | -2.302491000 | 0.891881000  | -0.123401000 |
| C | -3.615719000 | 0.488877000  | -0.091797000 |
| C | -3.924278000 | -0.882311000 | -0.036790000 |

|   |              |              |              |
|---|--------------|--------------|--------------|
| C | -2.911827000 | -1.834568000 | -0.017763000 |
| O | 3.836414000  | -3.780547000 | -0.022058000 |
| C | 0.614353000  | 1.898073000  | 2.337313000  |
| O | -5.237305000 | -1.212162000 | -0.005956000 |
| H | 1.271888000  | 4.446005000  | 1.715697000  |
| H | 1.513910000  | 5.488884000  | -0.503795000 |
| H | 1.125083000  | 4.139331000  | -2.556184000 |
| H | 0.496982000  | 1.757983000  | -2.348718000 |
| H | 1.218036000  | -4.120651000 | 0.013660000  |
| H | 4.476223000  | -1.256841000 | -0.127584000 |
| H | 2.854367000  | 0.586636000  | -0.179563000 |
| H | -2.067967000 | 1.946414000  | -0.166947000 |
| H | -4.422855000 | 1.208634000  | -0.106320000 |
| H | -3.128374000 | -2.894422000 | 0.022940000  |
| H | 0.764514000  | 2.651176000  | 3.110239000  |
| H | -0.372770000 | 1.454442000  | 2.486324000  |
| H | 1.349090000  | 1.104696000  | 2.494855000  |
| H | -5.352788000 | -2.171042000 | 0.037317000  |

Neutral form of Complex 1 S1(110.19) B3LYP/TZVP/IEFPCM

|   |              |              |              |
|---|--------------|--------------|--------------|
| C | -2.256615000 | -3.378836000 | 0.764639000  |
| C | -2.188956000 | -4.100129000 | -0.423409000 |
| C | -1.444420000 | -3.606264000 | -1.488994000 |
| C | -0.781569000 | -2.392123000 | -1.355439000 |
| C | -0.853389000 | -1.652087000 | -0.167694000 |
| C | -1.599679000 | -2.156231000 | 0.918893000  |
| C | -0.149706000 | -0.350872000 | -0.087871000 |
| C | 1.250933000  | -0.271844000 | -0.046567000 |
| C | 1.894976000  | 1.010060000  | -0.003564000 |
| O | 1.159445000  | 2.155093000  | -0.006872000 |
| C | -0.196936000 | 2.104628000  | -0.071618000 |
| C | -0.899490000 | 0.895023000  | -0.114583000 |
| C | -0.830691000 | 3.346536000  | -0.106500000 |
| C | -2.280282000 | 3.443468000  | -0.199321000 |
| C | -2.986561000 | 2.190603000  | -0.267178000 |
| C | -2.317076000 | 0.993775000  | -0.228656000 |
| C | 2.128346000  | -1.398158000 | -0.003288000 |
| C | 3.490636000  | -1.251128000 | 0.046191000  |
| C | 4.075612000  | 0.035008000  | 0.066832000  |
| C | 3.268991000  | 1.166458000  | 0.045619000  |
| O | -2.835841000 | 4.571292000  | -0.219424000 |
| C | -1.663592000 | -1.424047000 | 2.234550000  |
| O | 5.430084000  | 0.092369000  | 0.113683000  |
| H | -2.824772000 | -3.776318000 | 1.597981000  |



|   |              |              |              |
|---|--------------|--------------|--------------|
| H | -2.711538000 | -5.044756000 | -0.512173000 |
| H | -1.381642000 | -4.157862000 | -2.418903000 |
| H | -0.207763000 | -1.998454000 | -2.185879000 |
| H | -0.243017000 | 4.253598000  | -0.064727000 |
| H | -4.065364000 | 2.220215000  | -0.350946000 |
| H | -2.880473000 | 0.071441000  | -0.293095000 |
| H | 1.698055000  | -2.389204000 | -0.009958000 |
| H | 4.139823000  | -2.116536000 | 0.079448000  |
| H | 3.689126000  | 2.164026000  | 0.070876000  |
| H | -2.190854000 | -2.017084000 | 2.981601000  |
| H | -0.663172000 | -1.206106000 | 2.615660000  |
| H | -2.182802000 | -0.466697000 | 2.140276000  |
| H | 5.734354000  | 1.010081000  | 0.127399000  |

Neutral form of Complex 1 S1(75.37) B3LYP/TZVP/IEFPCM

|   |              |              |              |
|---|--------------|--------------|--------------|
| C | -1.555444000 | -3.756766000 | 0.760887000  |
| C | -2.132778000 | -4.129761000 | -0.447410000 |
| C | -2.057902000 | -3.273620000 | -1.541809000 |
| C | -1.401495000 | -2.056011000 | -1.413058000 |
| C | -0.801909000 | -1.678912000 | -0.204308000 |
| C | -0.887149000 | -2.537853000 | 0.909937000  |
| C | -0.102387000 | -0.372727000 | -0.128988000 |
| C | 1.297012000  | -0.282412000 | -0.119626000 |
| C | 1.932380000  | 1.003521000  | -0.060452000 |
| O | 1.186957000  | 2.140837000  | -0.016441000 |
| C | -0.170354000 | 2.079413000  | -0.034237000 |
| C | -0.863999000 | 0.864177000  | -0.095201000 |
| C | -0.815848000 | 3.314360000  | 0.012440000  |
| C | -2.269645000 | 3.397955000  | 0.015524000  |
| C | -2.967464000 | 2.139485000  | -0.031838000 |
| C | -2.286581000 | 0.949202000  | -0.079126000 |
| C | 2.182869000  | -1.400130000 | -0.190264000 |
| C | 3.545087000  | -1.242923000 | -0.181199000 |
| C | 4.120850000  | 0.045534000  | -0.106989000 |
| C | 3.306030000  | 1.170407000  | -0.051373000 |
| O | -2.835093000 | 4.520043000  | 0.061180000  |
| C | -0.289517000 | -2.166959000 | 2.243904000  |
| O | 5.475769000  | 0.111212000  | -0.102283000 |
| H | -1.629011000 | -4.420702000 | 1.614731000  |
| H | -2.643492000 | -5.081320000 | -0.531428000 |
| H | -2.504709000 | -3.550731000 | -2.488660000 |
| H | -1.338323000 | -1.387017000 | -2.263194000 |
| H | -0.235219000 | 4.226009000  | 0.053193000  |
| H | -4.049692000 | 2.158804000  | -0.022172000 |

|   |              |              |              |
|---|--------------|--------------|--------------|
| H | -2.844091000 | 0.021974000  | -0.108395000 |
| H | 1.758935000  | -2.391995000 | -0.259888000 |
| H | 4.201878000  | -2.101397000 | -0.236824000 |
| H | 3.719412000  | 2.170409000  | -0.006070000 |
| H | -0.674130000 | -2.815430000 | 3.031119000  |
| H | 0.799568000  | -2.265762000 | 2.237728000  |
| H | -0.514681000 | -1.132914000 | 2.510986000  |
| H | 5.774793000  | 1.029464000  | -0.055886000 |

Anionic form of Complex 2 S0 B3LYP/TZVP/IEFPCM

|   |              |              |              |
|---|--------------|--------------|--------------|
| C | -3.301922000 | 0.001964000  | 1.216869000  |
| C | -4.024582000 | -0.000412000 | 0.019845000  |
| C | -3.343054000 | -0.003163000 | -1.195142000 |
| C | -1.949833000 | -0.003009000 | -1.185315000 |
| C | -1.222091000 | -0.000351000 | 0.001158000  |
| C | -1.911906000 | 0.002131000  | 1.230715000  |
| C | 0.271191000  | -0.000197000 | -0.054530000 |
| C | 0.977395000  | -1.213263000 | -0.086848000 |
| C | 2.405330000  | -1.195354000 | -0.140417000 |
| O | 3.073695000  | 0.000128000  | -0.166143000 |
| C | 2.405013000  | 1.195458000  | -0.140937000 |
| C | 0.977102000  | 1.213007000  | -0.087325000 |
| C | 3.164112000  | 2.334618000  | -0.172797000 |
| C | 2.554157000  | 3.637256000  | -0.145268000 |
| C | 1.099550000  | 3.649477000  | -0.088265000 |
| C | 0.366176000  | 2.503642000  | -0.060055000 |
| C | 0.366895000  | -2.504119000 | -0.058658000 |
| C | 1.100616000  | -3.649736000 | -0.086207000 |
| C | 2.555251000  | -3.637161000 | -0.143144000 |
| C | 3.164760000  | -2.334286000 | -0.171684000 |
| O | 3.226184000  | 4.702174000  | -0.170573000 |
| C | -1.173686000 | 0.004479000  | 2.545672000  |
| O | 3.227574000  | -4.701847000 | -0.168742000 |
| H | -3.853762000 | 0.003513000  | 2.149316000  |
| H | -3.868346000 | -0.005873000 | -2.139086000 |
| H | -1.421440000 | -0.005156000 | -2.131309000 |
| H | 4.243687000  | 2.261968000  | -0.214767000 |
| H | 0.612611000  | 4.617512000  | -0.066946000 |
| H | -0.714589000 | 2.554027000  | -0.018953000 |
| H | -0.713831000 | -2.554862000 | -0.017460000 |
| H | 0.613974000  | -4.617917000 | -0.064300000 |
| H | 4.244306000  | -2.261277000 | -0.213796000 |
| H | -1.871168000 | 0.005215000  | 3.382761000  |
| H | -0.530117000 | -0.873105000 | 2.641496000  |

|   |              |              |              |
|---|--------------|--------------|--------------|
| H | -0.531247000 | 0.883133000  | 2.638980000  |
| O | -5.382997000 | -0.001152000 | 0.145433000  |
| C | -6.176509000 | -0.000865000 | -1.042509000 |
| H | -7.210887000 | 0.000080000  | -0.708348000 |
| H | -5.988265000 | 0.891678000  | -1.644397000 |
| H | -5.990365000 | -0.894059000 | -1.643943000 |

Anionic form of Complex **2** S1(74.25) B3LYP/TZVP/IEFPCM

|   |              |              |              |
|---|--------------|--------------|--------------|
| C | 3.342757000  | 0.315970000  | 1.177967000  |
| C | 4.052916000  | 0.000442000  | 0.016372000  |
| C | 3.357197000  | -0.329536000 | -1.145203000 |
| C | 1.964876000  | -0.327319000 | -1.118113000 |
| C | 1.237496000  | -0.003822000 | 0.029656000  |
| C | 1.952445000  | 0.317129000  | 1.207250000  |
| C | -0.244440000 | -0.009251000 | -0.012615000 |
| C | -0.992131000 | 1.210196000  | -0.025989000 |
| C | -2.415080000 | 1.177680000  | -0.081698000 |
| O | -3.093598000 | -0.018691000 | -0.131101000 |
| C | -2.403396000 | -1.209580000 | -0.162757000 |
| C | -0.978901000 | -1.231800000 | -0.100534000 |
| C | -3.165791000 | -2.348834000 | -0.244926000 |
| C | -2.563324000 | -3.657905000 | -0.262411000 |
| C | -1.116653000 | -3.679919000 | -0.179363000 |
| C | -0.379542000 | -2.527718000 | -0.099310000 |
| C | -0.401235000 | 2.509800000  | -0.015643000 |
| C | -1.147858000 | 3.658906000  | -0.031440000 |
| C | -2.595826000 | 3.627241000  | -0.065666000 |
| C | -3.188005000 | 2.313119000  | -0.098957000 |
| O | -3.253115000 | -4.715703000 | -0.338031000 |
| C | 1.235880000  | 0.639419000  | 2.493986000  |
| O | -3.296799000 | 4.680297000  | -0.074220000 |
| H | 3.904769000  | 0.551863000  | 2.074130000  |
| H | 3.872411000  | -0.580101000 | -2.061364000 |
| H | 1.428017000  | -0.577335000 | -2.025761000 |
| H | -4.244991000 | -2.270451000 | -0.288980000 |
| H | -0.628952000 | -4.647899000 | -0.174418000 |
| H | 0.699051000  | -2.585940000 | -0.033760000 |
| H | 0.679441000  | 2.574010000  | -0.000210000 |
| H | -0.667097000 | 4.630282000  | -0.020459000 |
| H | -4.266602000 | 2.227229000  | -0.141864000 |
| H | 1.933797000  | 0.672239000  | 3.330607000  |
| H | 0.732562000  | 1.608487000  | 2.439755000  |
| H | 0.467337000  | -0.104373000 | 2.714270000  |
| O | 5.414418000  | 0.037016000  | 0.121597000  |

|   |             |              |              |
|---|-------------|--------------|--------------|
| C | 6.194423000 | -0.285023000 | -1.030306000 |
| H | 7.232651000 | -0.193417000 | -0.721136000 |
| H | 6.004600000 | -1.307937000 | -1.365336000 |
| H | 5.997833000 | 0.410080000  | -1.850521000 |

Anionic form of Complex 2 S1 (108.52) B3LYP/TZVP/IEFPCM

|   |              |              |              |
|---|--------------|--------------|--------------|
| C | -3.354343000 | 0.206260000  | 1.178811000  |
| C | -4.053314000 | -0.080943000 | 0.003150000  |
| C | -3.346473000 | -0.349533000 | -1.167472000 |
| C | -1.954671000 | -0.315604000 | -1.134827000 |
| C | -1.238626000 | -0.019463000 | 0.027349000  |
| C | -1.964563000 | 0.239002000  | 1.213611000  |
| C | 0.243135000  | 0.011517000  | -0.009229000 |
| C | 1.006484000  | -1.189171000 | -0.141214000 |
| C | 2.430250000  | -1.131181000 | -0.197057000 |
| O | 3.092075000  | 0.073458000  | -0.116961000 |
| C | 2.385419000  | 1.250748000  | -0.023465000 |
| C | 0.961935000  | 1.247754000  | 0.027729000  |
| C | 3.131440000  | 2.403780000  | 0.006555000  |
| C | 2.508377000  | 3.701383000  | 0.088648000  |
| C | 1.059969000  | 3.697801000  | 0.118001000  |
| C | 0.340575000  | 2.531777000  | 0.086164000  |
| C | 0.437855000  | -2.497874000 | -0.192214000 |
| C | 1.202166000  | -3.628527000 | -0.313725000 |
| C | 2.648145000  | -3.569401000 | -0.390447000 |
| C | 3.219535000  | -2.248229000 | -0.319984000 |
| O | 3.184404000  | 4.770068000  | 0.124100000  |
| C | -1.259767000 | 0.528221000  | 2.514621000  |
| O | 3.362894000  | -4.607006000 | -0.504328000 |
| H | -3.924526000 | 0.394170000  | 2.081137000  |
| H | -3.852835000 | -0.576774000 | -2.094586000 |
| H | -1.409310000 | -0.517815000 | -2.049290000 |
| H | 4.211890000  | 2.344916000  | -0.035275000 |
| H | 0.556433000  | 4.656493000  | 0.164739000  |
| H | -0.741356000 | 2.570032000  | 0.099616000  |
| H | -0.639246000 | -2.583877000 | -0.133023000 |
| H | 0.737414000  | -4.607145000 | -0.347985000 |
| H | 4.296710000  | -2.142918000 | -0.356873000 |
| H | -1.960752000 | 0.511885000  | 3.349160000  |
| H | -0.474207000 | -0.204941000 | 2.708978000  |
| H | -0.779746000 | 1.510427000  | 2.499890000  |
| O | -5.415618000 | -0.080539000 | 0.104381000  |
| C | -6.184309000 | -0.376340000 | -1.062073000 |
| H | -7.225344000 | -0.321051000 | -0.753714000 |

|   |              |              |              |
|---|--------------|--------------|--------------|
| H | -6.001693000 | 0.354153000  | -1.854283000 |
| H | -5.969382000 | -1.380907000 | -1.435285000 |

Neutral form of Complex 2 S0 B3LYP/TZVP/IEFPCM

|   |              |              |              |
|---|--------------|--------------|--------------|
| C | -3.419485000 | -0.077870000 | 0.800559000  |
| C | -4.021153000 | -0.025866000 | -0.456782000 |
| C | -3.223754000 | 0.064001000  | -1.600528000 |
| C | -1.846667000 | 0.098481000  | -1.470896000 |
| C | -1.232966000 | 0.044847000  | -0.214270000 |
| C | -2.028003000 | -0.045452000 | 0.937685000  |
| C | 0.256473000  | 0.072769000  | -0.132812000 |
| C | 0.989027000  | -1.160868000 | -0.108463000 |
| C | 2.395724000  | -1.117894000 | -0.038505000 |
| O | 3.062532000  | 0.065153000  | 0.002854000  |
| C | 2.394100000  | 1.257728000  | -0.027625000 |
| C | 0.952570000  | 1.264752000  | -0.100476000 |
| C | 3.140850000  | 2.394310000  | 0.009666000  |
| C | 2.512986000  | 3.694015000  | -0.010700000 |
| C | 1.049383000  | 3.701168000  | -0.079425000 |
| C | 0.325769000  | 2.560799000  | -0.117967000 |
| C | 0.387594000  | -2.437936000 | -0.151976000 |
| C | 1.139836000  | -3.587533000 | -0.126621000 |
| C | 2.541953000  | -3.503228000 | -0.056653000 |
| C | 3.174525000  | -2.266287000 | -0.013315000 |
| O | 3.166629000  | 4.756482000  | 0.027526000  |
| C | -1.416615000 | -0.093021000 | 2.315981000  |
| O | 3.224092000  | -4.672999000 | -0.037555000 |
| H | -4.022690000 | -0.143116000 | 1.695063000  |
| H | -3.693996000 | 0.105098000  | -2.574492000 |
| H | -1.232326000 | 0.167348000  | -2.360532000 |
| H | 4.220092000  | 2.335933000  | 0.062282000  |
| H | 0.564354000  | 4.669624000  | -0.093719000 |
| H | -0.754339000 | 2.598352000  | -0.166736000 |
| H | -0.690100000 | -2.504187000 | -0.209082000 |
| H | 0.673695000  | -4.562893000 | -0.161066000 |
| H | 4.252533000  | -2.180631000 | 0.038391000  |
| H | -2.186631000 | -0.200045000 | 3.079182000  |
| H | -0.722490000 | -0.930146000 | 2.418564000  |
| H | -0.853746000 | 0.818360000  | 2.531925000  |
| H | 4.177144000  | -4.516599000 | 0.003132000  |
| O | -5.366937000 | -0.055841000 | -0.666529000 |
| C | -6.237641000 | -0.149974000 | 0.463045000  |
| H | -7.246186000 | -0.161528000 | 0.057963000  |
| H | -6.060729000 | -1.070887000 | 1.023811000  |

|   |              |             |             |
|---|--------------|-------------|-------------|
| H | -6.122153000 | 0.711305000 | 1.125405000 |
|---|--------------|-------------|-------------|

Neutral form of Complex 2 S1(75.05) CAM-B3LYP/TZVP/IEFPCM

|   |              |              |              |
|---|--------------|--------------|--------------|
| C | -3.436022000 | -0.252811000 | 0.745686000  |
| C | -4.033550000 | 0.157274000  | -0.437449000 |
| C | -3.238640000 | 0.539213000  | -1.514814000 |
| C | -1.867509000 | 0.499284000  | -1.392236000 |
| C | -1.248859000 | 0.076142000  | -0.213506000 |
| C | -2.048109000 | -0.296265000 | 0.870703000  |
| C | 0.228630000  | 0.044353000  | -0.138107000 |
| C | 0.944043000  | -1.158361000 | -0.187019000 |
| C | 2.372472000  | -1.148605000 | -0.096141000 |
| O | 3.050333000  | 0.010705000  | 0.033046000  |
| C | 2.381616000  | 1.205280000  | 0.060932000  |
| C | 0.981925000  | 1.264827000  | -0.027303000 |
| C | 3.169517000  | 2.319412000  | 0.175748000  |
| C | 2.581239000  | 3.647402000  | 0.230760000  |
| C | 1.143332000  | 3.699022000  | 0.153319000  |
| C | 0.400096000  | 2.564177000  | 0.036131000  |
| C | 0.342826000  | -2.439718000 | -0.340705000 |
| C | 1.086153000  | -3.581799000 | -0.383156000 |
| C | 2.490631000  | -3.521017000 | -0.277554000 |
| C | 3.128804000  | -2.299751000 | -0.137618000 |
| O | 3.303224000  | 4.659461000  | 0.340336000  |
| C | -1.441059000 | -0.734618000 | 2.174796000  |
| O | 3.153073000  | -4.691908000 | -0.328013000 |
| H | -4.039425000 | -0.538795000 | 1.595001000  |
| H | -3.711137000 | 0.860408000  | -2.433538000 |
| H | -1.252670000 | 0.795926000  | -2.233182000 |
| H | 4.244857000  | 2.222291000  | 0.234681000  |
| H | 0.671887000  | 4.672076000  | 0.197386000  |
| H | -0.677907000 | 2.633833000  | -0.015480000 |
| H | -0.732462000 | -2.493350000 | -0.433567000 |
| H | 0.617658000  | -4.549299000 | -0.502951000 |
| H | 4.206167000  | -2.228471000 | -0.062354000 |
| H | -2.192604000 | -0.765773000 | 2.961872000  |
| H | -1.003597000 | -1.731736000 | 2.093298000  |
| H | -0.643871000 | -0.059635000 | 2.487301000  |
| H | 4.107083000  | -4.558755000 | -0.258090000 |
| O | -5.375207000 | 0.223261000  | -0.631960000 |
| C | -6.236428000 | -0.151703000 | 0.433223000  |
| H | -7.248105000 | -0.026489000 | 0.058538000  |
| H | -6.082821000 | -1.194326000 | 0.718559000  |
| H | -6.091635000 | 0.490240000  | 1.304454000  |

Neutral form of Complex 2 S1(109.80) CAM-B3LYP/TZVP/IEFPCM

|   |              |              |              |
|---|--------------|--------------|--------------|
| C | -3.463798000 | 0.052427000  | 0.732319000  |
| C | -4.010315000 | -0.410529000 | -0.457472000 |
| C | -3.171231000 | -0.758988000 | -1.511755000 |
| C | -1.807794000 | -0.632077000 | -1.362871000 |
| C | -1.240702000 | -0.155808000 | -0.178004000 |
| C | -2.085615000 | 0.183265000  | 0.884208000  |
| C | 0.227383000  | -0.020157000 | -0.078203000 |
| C | 1.065459000  | -1.142333000 | -0.015226000 |
| C | 2.485324000  | -0.975527000 | 0.024945000  |
| O | 3.040964000  | 0.254362000  | -0.000084000 |
| C | 2.250972000  | 1.369572000  | -0.078205000 |
| C | 0.851375000  | 1.276409000  | -0.117921000 |
| C | 2.919880000  | 2.564054000  | -0.121831000 |
| C | 2.198233000  | 3.821485000  | -0.221581000 |
| C | 0.762681000  | 3.716186000  | -0.285301000 |
| C | 0.140283000  | 2.506229000  | -0.235974000 |
| C | 0.599313000  | -2.486203000 | 0.045866000  |
| C | 1.458400000  | -3.542919000 | 0.115286000  |
| C | 2.850529000  | -3.327073000 | 0.137083000  |
| C | 3.358511000  | -2.039554000 | 0.092656000  |
| O | 2.812314000  | 4.907589000  | -0.251609000 |
| C | -1.527600000 | 0.656320000  | 2.196935000  |
| O | 3.633661000  | -4.420226000 | 0.209078000  |
| H | -4.101661000 | 0.310438000  | 1.565246000  |
| H | -3.603836000 | -1.120320000 | -2.435193000 |
| H | -1.158256000 | -0.898161000 | -2.187649000 |
| H | 4.000303000  | 2.584208000  | -0.081923000 |
| H | 0.194271000  | 4.632922000  | -0.371650000 |
| H | -0.938947000 | 2.457304000  | -0.294363000 |
| H | -0.466676000 | -2.660127000 | 0.039503000  |
| H | 1.091087000  | -4.559001000 | 0.165283000  |
| H | 4.423812000  | -1.849701000 | 0.116422000  |
| H | -2.315710000 | 0.762977000  | 2.940271000  |
| H | -0.785341000 | -0.044217000 | 2.582229000  |
| H | -1.030486000 | 1.622924000  | 2.093788000  |
| H | 4.568913000  | -4.180234000 | 0.227365000  |
| O | -5.340638000 | -0.559606000 | -0.677605000 |
| C | -6.246334000 | -0.213548000 | 0.360478000  |
| H | -7.240185000 | -0.403754000 | -0.033947000 |
| H | -6.085747000 | -0.829020000 | 1.247792000  |
| H | -6.158514000 | 0.841608000  | 0.626850000  |

Anionic form of Complex **3** S0 B3LYP/TZVP/IEFPCM

|   |              |              |              |
|---|--------------|--------------|--------------|
| C | -3.587789000 | -0.001384000 | 1.027784000  |
| C | -4.260647000 | -0.000383000 | -0.193433000 |
| C | -3.575464000 | 0.000621000  | -1.404489000 |
| C | -2.177244000 | 0.000713000  | -1.355117000 |
| C | -1.477485000 | -0.000278000 | -0.153221000 |
| C | -2.194990000 | -0.001351000 | 1.056330000  |
| C | 0.015895000  | 0.000040000  | -0.151765000 |
| C | 0.720435000  | -1.213227000 | -0.161088000 |
| C | 2.149093000  | -1.194970000 | -0.168961000 |
| O | 2.817795000  | 0.000689000  | -0.174694000 |
| C | 2.148548000  | 1.196039000  | -0.168504000 |
| C | 0.719876000  | 1.213643000  | -0.160594000 |
| C | 2.907866000  | 2.335550000  | -0.172301000 |
| C | 2.296866000  | 3.637926000  | -0.161765000 |
| C | 0.841230000  | 3.649675000  | -0.150364000 |
| C | 0.107685000  | 2.503636000  | -0.149328000 |
| C | 0.108829000  | -2.503502000 | -0.150403000 |
| C | 0.842892000  | -3.649208000 | -0.151959000 |
| C | 2.298527000  | -3.636791000 | -0.163189000 |
| C | 2.908932000  | -2.334129000 | -0.173320000 |
| O | 2.969046000  | 4.703138000  | -0.162916000 |
| O | 2.971196000  | -4.701690000 | -0.164596000 |
| H | -4.158864000 | -0.002035000 | 1.945195000  |
| H | -5.344682000 | -0.000322000 | -0.190420000 |
| H | -1.612216000 | 0.001680000  | -2.280973000 |
| H | 3.988249000  | 2.263295000  | -0.179760000 |
| H | 0.353486000  | 4.617472000  | -0.142280000 |
| H | -0.973851000 | 2.554065000  | -0.142436000 |
| H | -0.972686000 | -2.554418000 | -0.143602000 |
| H | 0.355597000  | -4.617236000 | -0.144278000 |
| H | 3.989281000  | -2.261371000 | -0.180683000 |
| O | -1.448768000 | -0.002144000 | 2.199548000  |
| C | -2.125455000 | -0.002537000 | 3.456954000  |
| H | -2.744273000 | -0.895564000 | 3.574085000  |
| H | -1.344385000 | -0.002764000 | 4.212942000  |
| H | -2.744293000 | 0.890404000  | 3.574617000  |
| C | -4.300716000 | 0.000749000  | -2.726883000 |
| H | -4.050960000 | -0.884045000 | -3.318298000 |
| H | -5.381416000 | 0.011407000  | -2.581871000 |
| H | -4.034442000 | 0.874490000  | -3.327293000 |

Anionic form of Complex **3** S1(65.00)TZVP/IEFPCM

|   |              |              |             |
|---|--------------|--------------|-------------|
| C | -3.660796000 | -0.499304000 | 0.786024000 |
|---|--------------|--------------|-------------|



|   |              |              |              |
|---|--------------|--------------|--------------|
| C | -4.288227000 | 0.226163000  | -0.226336000 |
| C | -3.549875000 | 0.911018000  | -1.188772000 |
| C | -2.157982000 | 0.842657000  | -1.105432000 |
| C | -1.487276000 | 0.119994000  | -0.111773000 |
| C | -2.270834000 | -0.553384000 | 0.854214000  |
| C | -0.013248000 | 0.077464000  | -0.082629000 |
| C | 0.702013000  | -1.149546000 | -0.288004000 |
| C | 2.124326000  | -1.155960000 | -0.292591000 |
| O | 2.840151000  | 0.004683000  | -0.113040000 |
| C | 2.187553000  | 1.204173000  | 0.055378000  |
| C | 0.762749000  | 1.266945000  | 0.080880000  |
| C | 2.989463000  | 2.309142000  | 0.206339000  |
| C | 2.433088000  | 3.618705000  | 0.426122000  |
| C | 0.985535000  | 3.676899000  | 0.487621000  |
| C | 0.209586000  | 2.560150000  | 0.331054000  |
| C | 0.076814000  | -2.405332000 | -0.549072000 |
| C | 0.789564000  | -3.558113000 | -0.744350000 |
| C | 2.238189000  | -3.573108000 | -0.713677000 |
| C | 2.867036000  | -2.297294000 | -0.482785000 |
| O | 3.156965000  | 4.646070000  | 0.566786000  |
| O | 2.908630000  | -4.631163000 | -0.888059000 |
| H | -4.267442000 | -1.004922000 | 1.523815000  |
| H | -5.371542000 | 0.255107000  | -0.255334000 |
| H | -1.561040000 | 1.356750000  | -1.850807000 |
| H | 4.066107000  | 2.196787000  | 0.176556000  |
| H | 0.530086000  | 4.642016000  | 0.677561000  |
| H | -0.866694000 | 2.647295000  | 0.394621000  |
| H | -1.003829000 | -2.434599000 | -0.588750000 |
| H | 0.281115000  | -4.495467000 | -0.937847000 |
| H | 3.948391000  | -2.241071000 | -0.474899000 |
| O | -1.585426000 | -1.205757000 | 1.839713000  |
| C | -2.322882000 | -1.926257000 | 2.825635000  |
| H | -2.925618000 | -2.717837000 | 2.373000000  |
| H | -1.580822000 | -2.369989000 | 3.484813000  |
| H | -2.969749000 | -1.261772000 | 3.404440000  |
| C | -4.222268000 | 1.670950000  | -2.305639000 |
| H | -4.203472000 | 1.102912000  | -3.240643000 |
| H | -5.266987000 | 1.877087000  | -2.068838000 |
| H | -3.723790000 | 2.623443000  | -2.497263000 |

Anionic form of Complex **3** S1(118.74)/IEFPCM

|   |              |              |              |
|---|--------------|--------------|--------------|
| C | -3.634313000 | 0.523243000  | 0.959559000  |
| C | -4.288454000 | 0.200958000  | -0.228406000 |
| C | -3.577240000 | -0.180078000 | -1.364812000 |

|   |              |              |              |
|---|--------------|--------------|--------------|
| C | -2.185215000 | -0.214576000 | -1.274723000 |
| C | -1.487074000 | 0.109572000  | -0.104419000 |
| C | -2.243888000 | 0.472965000  | 1.033092000  |
| C | -0.013232000 | 0.068921000  | -0.076671000 |
| C | 0.702460000  | -1.144524000 | -0.320223000 |
| C | 2.128776000  | -1.146410000 | -0.336925000 |
| O | 2.840668000  | 0.008421000  | -0.107778000 |
| C | 2.183987000  | 1.197471000  | 0.108038000  |
| C | 0.763109000  | 1.259364000  | 0.123024000  |
| C | 2.983238000  | 2.300662000  | 0.294228000  |
| C | 2.419502000  | 3.610989000  | 0.498395000  |
| C | 0.972136000  | 3.677700000  | 0.476601000  |
| C | 0.202308000  | 2.560601000  | 0.291208000  |
| C | 0.084766000  | -2.419683000 | -0.502701000 |
| C | 0.803716000  | -3.562309000 | -0.728710000 |
| C | 2.252823000  | -3.557659000 | -0.781949000 |
| C | 2.874382000  | -2.277358000 | -0.564671000 |
| O | 3.142293000  | 4.633784000  | 0.673737000  |
| O | 2.924232000  | -4.608148000 | -0.993722000 |
| H | -4.220457000 | 0.803550000  | 1.823209000  |
| H | -5.370973000 | 0.250640000  | -0.260337000 |
| H | -1.608534000 | -0.483834000 | -2.152716000 |
| H | 4.060437000  | 2.192227000  | 0.273655000  |
| H | 0.511728000  | 4.650544000  | 0.603805000  |
| H | -0.875236000 | 2.653966000  | 0.272309000  |
| H | -0.994900000 | -2.470371000 | -0.460618000 |
| H | 0.300034000  | -4.512924000 | -0.861313000 |
| H | 3.955433000  | -2.214097000 | -0.566001000 |
| O | -1.535803000 | 0.735683000  | 2.171695000  |
| C | -2.244865000 | 1.136160000  | 3.342940000  |
| H | -2.933488000 | 0.356277000  | 3.678459000  |
| H | -1.487735000 | 1.300201000  | 4.105777000  |
| H | -2.798533000 | 2.063757000  | 3.176210000  |
| C | -4.282669000 | -0.557238000 | -2.644176000 |
| H | -4.472596000 | -1.634088000 | -2.689678000 |
| H | -5.246847000 | -0.053153000 | -2.728612000 |
| H | -3.685539000 | -0.296321000 | -3.519696000 |

Neutral form of Complex 3 S0 B3LYP/TZVP/IEFPCM

|   |              |              |              |
|---|--------------|--------------|--------------|
| C | -3.578280000 | -0.523939000 | 0.995410000  |
| C | -4.268108000 | -0.314800000 | -0.197559000 |
| C | -3.609189000 | 0.031942000  | -1.373563000 |
| C | -2.218307000 | 0.165660000  | -1.318814000 |
| C | -1.502431000 | -0.041221000 | -0.143666000 |

|   |              |              |              |
|---|--------------|--------------|--------------|
| C | -2.192449000 | -0.390129000 | 1.031328000  |
| C | -0.018316000 | 0.092129000  | -0.134175000 |
| C | 0.799129000  | -1.083815000 | -0.215765000 |
| C | 2.200064000  | -0.938783000 | -0.221546000 |
| O | 2.781800000  | 0.287344000  | -0.154376000 |
| C | 2.029095000  | 1.426486000  | -0.082840000 |
| C | 0.589046000  | 1.330151000  | -0.072706000 |
| C | 2.693698000  | 2.612285000  | -0.027079000 |
| C | 1.975265000  | 3.860806000  | 0.065187000  |
| C | 0.513825000  | 3.762058000  | 0.091815000  |
| C | -0.128005000 | 2.574604000  | 0.030643000  |
| C | 0.289605000  | -2.397768000 | -0.304001000 |
| C | 1.122711000  | -3.487647000 | -0.381752000 |
| C | 2.516861000  | -3.302241000 | -0.379021000 |
| C | 3.059883000  | -2.025598000 | -0.299150000 |
| O | 2.552917000  | 4.965714000  | 0.122206000  |
| O | 3.282367000  | -4.416846000 | -0.460337000 |
| H | -4.130183000 | -0.785977000 | 1.886538000  |
| H | -5.346441000 | -0.424818000 | -0.200459000 |
| H | -1.672761000 | 0.433773000  | -2.216832000 |
| H | 3.775553000  | 2.631094000  | -0.040214000 |
| H | -0.038336000 | 4.690689000  | 0.170042000  |
| H | -1.208674000 | 2.534386000  | 0.055186000  |
| H | -0.781858000 | -2.542003000 | -0.311437000 |
| H | 0.726801000  | -4.491880000 | -0.449082000 |
| H | 4.130073000  | -1.862213000 | -0.299771000 |
| H | 4.222223000  | -4.190759000 | -0.454978000 |
| C | -4.354842000 | 0.251393000  | -2.665862000 |
| H | -4.075316000 | -0.492381000 | -3.416779000 |
| H | -5.432274000 | 0.182452000  | -2.513506000 |
| H | -4.136683000 | 1.234717000  | -3.089304000 |
| O | -1.427502000 | -0.563938000 | 2.146641000  |
| C | -2.070614000 | -0.935751000 | 3.367544000  |
| H | -2.582639000 | -1.895743000 | 3.267904000  |
| H | -1.276356000 | -1.023466000 | 4.104242000  |
| H | -2.781621000 | -0.170996000 | 3.688820000  |

Neutral form of Complex **3** S1(67.20) CAM-B3LYP/TZVP/IEFPCM

|   |             |             |              |
|---|-------------|-------------|--------------|
| C | 1.133294000 | 3.759516000 | 0.811017000  |
| C | 1.515080000 | 4.299214000 | -0.407234000 |
| C | 1.493724000 | 3.546598000 | -1.573784000 |
| C | 1.077895000 | 2.224936000 | -1.476816000 |
| C | 0.678598000 | 1.650953000 | -0.273798000 |
| C | 0.715625000 | 2.436920000 | 0.887108000  |

|   |              |              |              |
|---|--------------|--------------|--------------|
| C | 0.245909000  | 0.241047000  | -0.229581000 |
| C | -1.076185000 | -0.116835000 | 0.069247000  |
| C | -1.457584000 | -1.494515000 | 0.093263000  |
| O | -0.561320000 | -2.468043000 | -0.169758000 |
| C | 0.738261000  | -2.151852000 | -0.462857000 |
| C | 1.178338000  | -0.819683000 | -0.508852000 |
| C | 1.560677000  | -3.219445000 | -0.707411000 |
| C | 2.967921000  | -3.024063000 | -1.010664000 |
| C | 3.417797000  | -1.655538000 | -1.033293000 |
| C | 2.563056000  | -0.625182000 | -0.786781000 |
| C | -2.117961000 | 0.816665000  | 0.329849000  |
| C | -3.389500000 | 0.415395000  | 0.611966000  |
| C | -3.712310000 | -0.956618000 | 0.641443000  |
| C | -2.741294000 | -1.907811000 | 0.379963000  |
| O | 3.715103000  | -3.999427000 | -1.230184000 |
| O | -4.989766000 | -1.272579000 | 0.926410000  |
| H | 1.173112000  | 4.375926000  | 1.696728000  |
| H | 1.840647000  | 5.332120000  | -0.441861000 |
| H | 1.050669000  | 1.612297000  | -2.370725000 |
| H | 1.169873000  | -4.226860000 | -0.666366000 |
| H | 4.463498000  | -1.473562000 | -1.243659000 |
| H | 2.934521000  | 0.389934000  | -0.804038000 |
| H | -1.882271000 | 1.870265000  | 0.301097000  |
| H | -4.172343000 | 1.135622000  | 0.807550000  |
| H | -2.967227000 | -2.966302000 | 0.385478000  |
| H | -5.124387000 | -2.228877000 | 0.918046000  |
| C | 1.875513000  | 4.147418000  | -2.898269000 |
| H | 1.024772000  | 4.654085000  | -3.359832000 |
| H | 2.669937000  | 4.884931000  | -2.782803000 |
| H | 2.219136000  | 3.383694000  | -3.595661000 |
| O | 0.347776000  | 1.826894000  | 2.043358000  |
| C | 0.357625000  | 2.582983000  | 3.244850000  |
| H | -0.327735000 | 3.430827000  | 3.185403000  |
| H | 0.025526000  | 1.905983000  | 4.026494000  |
| H | 1.361839000  | 2.941188000  | 3.480118000  |

Neutral form of Complex 3 S1(119.15) CAM-B3LYP/TZVP/IEFPCM

|   |              |              |              |
|---|--------------|--------------|--------------|
| C | -3.691682000 | -0.197392000 | 0.779371000  |
| C | -4.166569000 | -1.014872000 | -0.235863000 |
| C | -3.317267000 | -1.553955000 | -1.192550000 |
| C | -1.967559000 | -1.236416000 | -1.107004000 |
| C | -1.453911000 | -0.413166000 | -0.108711000 |
| C | -2.338847000 | 0.100100000  | 0.853861000  |
| C | -0.021122000 | -0.081545000 | -0.070798000 |

|   |              |              |              |
|---|--------------|--------------|--------------|
| C | 0.961688000  | -1.073292000 | 0.080020000  |
| C | 2.344788000  | -0.719108000 | 0.045457000  |
| O | 2.732517000  | 0.561059000  | -0.137940000 |
| C | 1.799587000  | 1.549067000  | -0.300416000 |
| C | 0.424693000  | 1.275679000  | -0.266130000 |
| C | 2.306390000  | 2.807694000  | -0.494990000 |
| C | 1.426159000  | 3.943147000  | -0.706427000 |
| C | 0.015793000  | 3.649348000  | -0.698602000 |
| C | -0.442311000 | 2.384227000  | -0.494930000 |
| C | 0.686364000  | -2.448701000 | 0.322846000  |
| C | 1.681752000  | -3.368520000 | 0.473619000  |
| C | 3.031420000  | -2.972258000 | 0.407842000  |
| C | 3.356727000  | -1.644152000 | 0.194711000  |
| O | 1.892045000  | 5.087602000  | -0.884032000 |
| O | 3.957385000  | -3.937666000 | 0.568509000  |
| H | -4.383810000 | 0.195909000  | 1.509032000  |
| H | -5.227020000 | -1.233032000 | -0.277099000 |
| H | -1.284342000 | -1.623042000 | -1.854284000 |
| H | 3.375872000  | 2.967215000  | -0.503238000 |
| H | -0.669820000 | 4.469744000  | -0.865670000 |
| H | -1.506847000 | 2.197831000  | -0.502182000 |
| H | -0.344352000 | -2.763408000 | 0.390611000  |
| H | 1.455232000  | -4.409328000 | 0.661257000  |
| H | 4.385542000  | -1.310883000 | 0.153318000  |
| H | 4.851905000  | -3.577011000 | 0.520280000  |
| C | -3.831968000 | -2.461560000 | -2.275392000 |
| H | -3.738610000 | -3.510722000 | -1.985365000 |
| H | -4.884831000 | -2.271308000 | -2.482147000 |
| H | -3.273916000 | -2.328978000 | -3.202326000 |
| O | -1.781334000 | 0.859680000  | 1.829697000  |
| C | -2.632078000 | 1.459782000  | 2.795811000  |
| H | -3.157151000 | 0.703898000  | 3.382902000  |
| H | -1.983148000 | 2.035875000  | 3.448735000  |
| H | -3.357443000 | 2.125749000  | 2.324520000  |

Anionic form of Complex 4 S0 B3LYP/TZVP/IEFPCM

|   |              |              |              |
|---|--------------|--------------|--------------|
| C | 3.192625000  | -0.000742000 | 1.491133000  |
| C | 4.009541000  | -0.000332000 | 0.357917000  |
| C | 3.439134000  | 0.000195000  | -0.909748000 |
| C | 2.046067000  | 0.000288000  | -1.031084000 |
| C | 1.226444000  | -0.000114000 | 0.087911000  |
| C | 1.807548000  | -0.000647000 | 1.370329000  |
| C | -0.258711000 | 0.000035000  | -0.073449000 |
| C | -0.956776000 | 1.213872000  | -0.157148000 |
| C | -2.377215000 | 1.195873000  | -0.312436000 |

|   |              |              |              |
|---|--------------|--------------|--------------|
| O | -3.042185000 | 0.000364000  | -0.384654000 |
| C | -2.377470000 | -1.195268000 | -0.312795000 |
| C | -0.957013000 | -1.213602000 | -0.157516000 |
| C | -3.132259000 | -2.334446000 | -0.397556000 |
| C | -2.525531000 | -3.636996000 | -0.327166000 |
| C | -1.078287000 | -3.649325000 | -0.167845000 |
| C | -0.348777000 | -2.503653000 | -0.087282000 |
| C | -0.348306000 | 2.503771000  | -0.086507000 |
| C | -1.077612000 | 3.649618000  | -0.166724000 |
| C | -2.524834000 | 3.637614000  | -0.326073000 |
| C | -3.131813000 | 2.335208000  | -0.396855000 |
| O | -3.194109000 | -4.701853000 | -0.398772000 |
| O | -3.193229000 | 4.702629000  | -0.397360000 |
| H | 3.660708000  | -0.001119000 | 2.464839000  |
| H | 5.081682000  | -0.000446000 | 0.491439000  |
| H | 1.608250000  | 0.000675000  | -2.021499000 |
| H | -4.206183000 | -2.262000000 | -0.515544000 |
| H | -0.594132000 | -4.617492000 | -0.113975000 |
| H | 0.726479000  | -2.554377000 | 0.029328000  |
| H | 0.726956000  | 2.554309000  | 0.030123000  |
| H | -0.593247000 | 4.617660000  | -0.112561000 |
| H | -4.205745000 | 2.262976000  | -0.514884000 |
| O | 0.938644000  | -0.001025000 | 2.426540000  |
| C | 1.476474000  | -0.001972000 | 3.748271000  |
| H | 2.079625000  | 0.890850000  | 3.932586000  |
| H | 0.619326000  | -0.002478000 | 4.416928000  |
| H | 2.079673000  | -0.895022000 | 3.931291000  |
| O | 4.141206000  | 0.000550000  | -2.084876000 |
| C | 5.566590000  | 0.000538000  | -2.018110000 |
| H | 5.912945000  | 0.001044000  | -3.048621000 |
| H | 5.941043000  | 0.892994000  | -1.509618000 |
| H | 5.941087000  | -0.892386000 | -1.510462000 |

Anionic form of Complex 4 S1(64.40) B3LYP/TZVP/IEFPCM

|   |              |              |              |
|---|--------------|--------------|--------------|
| C | 3.237599000  | 0.429523000  | 1.426849000  |
| C | 4.040737000  | 0.009575000  | 0.361909000  |
| C | 3.444052000  | -0.429774000 | -0.814805000 |
| C | 2.051952000  | -0.435328000 | -0.916109000 |
| C | 1.230374000  | -0.015197000 | 0.131601000  |
| C | 1.851934000  | 0.417511000  | 1.329242000  |
| C | -0.236243000 | -0.034825000 | -0.017554000 |
| C | -1.003779000 | 1.177414000  | 0.013175000  |
| C | -2.414979000 | 1.134843000  | -0.159214000 |

|   |              |              |              |
|---|--------------|--------------|--------------|
| O | -3.068969000 | -0.057046000 | -0.365608000 |
| C | -2.360358000 | -1.233623000 | -0.443979000 |
| C | -0.944567000 | -1.251016000 | -0.269966000 |
| C | -3.101173000 | -2.365727000 | -0.681997000 |
| C | -2.487329000 | -3.666057000 | -0.750516000 |
| C | -1.052498000 | -3.687515000 | -0.540125000 |
| C | -0.337946000 | -2.543960000 | -0.306951000 |
| C | -0.436459000 | 2.478686000  | 0.156147000  |
| C | -1.197306000 | 3.616489000  | 0.178813000  |
| C | -2.639114000 | 3.572510000  | 0.038587000  |
| C | -3.205628000 | 2.259570000  | -0.139531000 |
| O | -3.152893000 | -4.718705000 | -0.968933000 |
| O | -3.353006000 | 4.615844000  | 0.059043000  |
| H | 3.720769000  | 0.752833000  | 2.337682000  |
| H | 5.114531000  | 0.031526000  | 0.477823000  |
| H | 1.605135000  | -0.760325000 | -1.847347000 |
| H | -4.174129000 | -2.286024000 | -0.805218000 |
| H | -0.557555000 | -4.651502000 | -0.560155000 |
| H | 0.729508000  | -2.608772000 | -0.145019000 |
| H | 0.638164000  | 2.555002000  | 0.253677000  |
| H | -0.732947000 | 4.589175000  | 0.291609000  |
| H | -4.275829000 | 2.165630000  | -0.275440000 |
| O | 1.013843000  | 0.772728000  | 2.351459000  |
| C | 1.587719000  | 1.242541000  | 3.568710000  |
| H | 2.185106000  | 2.143752000  | 3.406236000  |
| H | 0.750268000  | 1.477690000  | 4.221129000  |
| H | 2.208101000  | 0.474986000  | 4.039416000  |
| O | 4.126168000  | -0.861549000 | -1.923840000 |
| C | 5.551480000  | -0.856731000 | -1.880758000 |
| H | 5.880817000  | -1.227230000 | -2.848548000 |
| H | 5.942484000  | 0.152992000  | -1.727929000 |
| H | 5.929132000  | -1.515526000 | -1.093985000 |

Anionic form of Complex 4 S1(119.02) B3LYP/TZVP/IEFPCM

|   |              |              |              |
|---|--------------|--------------|--------------|
| C | -3.313724000 | -0.174997000 | 1.328861000  |
| C | -4.001943000 | -0.664885000 | 0.214493000  |
| C | -3.305936000 | -0.924841000 | -0.960996000 |
| C | -1.932174000 | -0.683290000 | -1.011184000 |
| C | -1.225279000 | -0.189019000 | 0.086707000  |
| C | -1.945215000 | 0.058843000  | 1.281805000  |
| C | 0.225515000  | 0.054264000  | -0.009255000 |
| C | 1.142244000  | -1.003967000 | -0.299680000 |
| C | 2.537321000  | -0.731633000 | -0.420391000 |

|   |              |              |              |
|---|--------------|--------------|--------------|
| O | 3.026803000  | 0.543258000  | -0.254407000 |
| C | 2.169197000  | 1.589671000  | -0.008817000 |
| C | 0.768253000  | 1.377154000  | 0.114125000  |
| C | 2.750214000  | 2.831168000  | 0.099564000  |
| C | 1.958331000  | 4.013536000  | 0.326173000  |
| C | 0.527816000  | 3.798922000  | 0.416090000  |
| C | -0.021457000 | 2.549936000  | 0.305188000  |
| C | 0.772391000  | -2.378079000 | -0.426773000 |
| C | 1.681919000  | -3.365068000 | -0.693594000 |
| C | 3.096127000  | -3.083358000 | -0.849456000 |
| C | 3.470870000  | -1.702552000 | -0.690569000 |
| O | 2.477896000  | 5.161694000  | 0.427710000  |
| O | 3.941223000  | -3.990454000 | -1.097717000 |
| H | -3.870384000 | 0.006052000  | 2.237127000  |
| H | -5.065740000 | -0.836050000 | 0.291827000  |
| H | -1.410414000 | -0.871094000 | -1.941228000 |
| H | 3.823599000  | 2.931838000  | -0.002145000 |
| H | -0.102329000 | 4.668230000  | 0.563372000  |
| H | -1.095084000 | 2.433321000  | 0.367374000  |
| H | -0.271237000 | -2.636058000 | -0.307729000 |
| H | 1.363998000  | -4.397392000 | -0.782372000 |
| H | 4.516259000  | -1.431158000 | -0.769852000 |
| O | -1.210186000 | 0.493716000  | 2.351446000  |
| C | -1.889715000 | 0.782586000  | 3.570677000  |
| H | -2.378227000 | -0.107925000 | 3.975547000  |
| H | -1.124083000 | 1.119671000  | 4.265258000  |
| H | -2.631298000 | 1.574661000  | 3.436011000  |
| O | -3.871771000 | -1.402766000 | -2.115643000 |
| C | -5.276532000 | -1.647572000 | -2.124688000 |
| H | -5.509734000 | -2.012397000 | -3.122120000 |
| H | -5.554053000 | -2.406639000 | -1.388178000 |
| H | -5.842273000 | -0.731571000 | -1.933207000 |

Neutral form of Complex 4 S0 B3LYP/TZVP/IEFPCM

|   |              |              |              |
|---|--------------|--------------|--------------|
| C | -3.194270000 | -0.506373000 | 1.448541000  |
| C | -4.016918000 | -0.339704000 | 0.332476000  |
| C | -3.460483000 | -0.030718000 | -0.903954000 |
| C | -2.073688000 | 0.109357000  | -1.011890000 |
| C | -1.249320000 | -0.056995000 | 0.091860000  |
| C | -1.814847000 | -0.369220000 | 1.342432000  |
| C | 0.227502000  | 0.085240000  | -0.053372000 |
| C | 1.039277000  | -1.086577000 | -0.207065000 |
| C | 2.430735000  | -0.932489000 | -0.362658000 |



|   |              |              |              |
|---|--------------|--------------|--------------|
| O | 3.007006000  | 0.298089000  | -0.369632000 |
| C | 2.258337000  | 1.433044000  | -0.225706000 |
| C | 0.827683000  | 1.327556000  | -0.064996000 |
| C | 2.916262000  | 2.623490000  | -0.246975000 |
| C | 2.201830000  | 3.867787000  | -0.087980000 |
| C | 0.751352000  | 3.759719000  | 0.089126000  |
| C | 0.115264000  | 2.567845000  | 0.102000000  |
| C | 0.532970000  | -2.404678000 | -0.223612000 |
| C | 1.361341000  | -3.490108000 | -0.377434000 |
| C | 2.746331000  | -3.295652000 | -0.526881000 |
| C | 3.285133000  | -2.014671000 | -0.519769000 |
| O | 2.774078000  | 4.976712000  | -0.096907000 |
| O | 3.507788000  | -4.405675000 | -0.677526000 |
| H | -3.652530000 | -0.743003000 | 2.397883000  |
| H | -5.084349000 | -0.454355000 | 0.453531000  |
| H | -1.646046000 | 0.348369000  | -1.977426000 |
| H | 3.990676000  | 2.649764000  | -0.372800000 |
| H | 0.203402000  | 4.685284000  | 0.217074000  |
| H | -0.956973000 | 2.521020000  | 0.237061000  |
| H | -0.531976000 | -2.555929000 | -0.113604000 |
| H | 0.968272000  | -4.497619000 | -0.389785000 |
| H | 4.347981000  | -1.844791000 | -0.635618000 |
| H | 4.440597000  | -4.172497000 | -0.778425000 |
| O | -0.937451000 | -0.506670000 | 2.380761000  |
| C | -1.456176000 | -0.828439000 | 3.671758000  |
| H | -1.974696000 | -1.790387000 | 3.662200000  |
| H | -0.593548000 | -0.889334000 | 4.330253000  |
| H | -2.133570000 | -0.050019000 | 4.031506000  |
| O | -4.169489000 | 0.154660000  | -2.058436000 |
| C | -5.590281000 | 0.025687000  | -2.006475000 |
| H | -5.942657000 | 0.212712000  | -3.017703000 |
| H | -5.886961000 | -0.980689000 | -1.699522000 |
| H | -6.031282000 | 0.759931000  | -1.327253000 |

Neutral form of Complex **4** S1(67.15) CAM-B3LYP/TZVP/IEFPCM

|   |              |              |              |
|---|--------------|--------------|--------------|
| C | -3.199758000 | -0.650003000 | 1.407372000  |
| C | -4.028973000 | -0.313327000 | 0.342334000  |
| C | -3.477326000 | 0.133453000  | -0.846397000 |
| C | -2.094981000 | 0.235753000  | -0.957822000 |
| C | -1.254447000 | -0.102171000 | 0.090406000  |
| C | -1.823603000 | -0.547093000 | 1.297032000  |
| C | 0.207337000  | 0.027642000  | -0.063203000 |
| C | 1.050960000  | -1.091992000 | -0.061536000 |
| C | 2.462114000  | -0.924882000 | -0.216685000 |

|   |              |              |              |
|---|--------------|--------------|--------------|
| O | 3.003200000  | 0.301304000  | -0.370876000 |
| C | 2.206230000  | 1.414212000  | -0.379181000 |
| C | 0.812762000  | 1.322004000  | -0.234862000 |
| C | 2.863548000  | 2.605034000  | -0.541103000 |
| C | 2.138797000  | 3.863942000  | -0.545418000 |
| C | 0.711718000  | 3.763295000  | -0.372575000 |
| C | 0.100433000  | 2.556906000  | -0.218868000 |
| C | 0.597646000  | -2.435371000 | 0.057263000  |
| C | 1.462161000  | -3.488964000 | 0.052818000  |
| C | 2.848679000  | -3.271463000 | -0.082470000 |
| C | 3.342783000  | -1.985741000 | -0.219646000 |
| O | 2.741920000  | 4.947224000  | -0.688220000 |
| O | 3.636060000  | -4.363441000 | -0.076444000 |
| H | -3.653874000 | -0.988887000 | 2.326504000  |
| H | -5.097625000 | -0.405649000 | 0.466333000  |
| H | -1.675840000 | 0.578922000  | -1.895018000 |
| H | 3.938677000  | 2.620783000  | -0.655757000 |
| H | 0.140612000  | 4.682271000  | -0.357922000 |
| H | -0.971406000 | 2.517429000  | -0.084014000 |
| H | -0.463164000 | -2.613603000 | 0.154707000  |
| H | 1.104276000  | -4.505569000 | 0.143720000  |
| H | 4.401119000  | -1.792963000 | -0.337227000 |
| H | 4.567243000  | -4.126514000 | -0.174604000 |
| O | -0.956297000 | -0.837733000 | 2.303959000  |
| C | -1.483959000 | -1.296721000 | 3.538124000  |
| H | -2.035114000 | -2.231007000 | 3.411166000  |
| H | -0.628291000 | -1.468989000 | 4.184544000  |
| H | -2.135884000 | -0.548346000 | 3.993706000  |
| O | -4.194338000 | 0.487094000  | -1.949814000 |
| C | -5.608389000 | 0.394243000  | -1.885293000 |
| H | -5.976248000 | 0.715942000  | -2.855356000 |
| H | -5.930783000 | -0.632703000 | -1.699403000 |
| H | -6.014317000 | 1.048431000  | -1.110483000 |

Neutral form of Complex **4** S1(118.54) CAM-B3LYP/TZVP/IEFPCM

|   |              |              |              |
|---|--------------|--------------|--------------|
| C | 3.250024000  | -0.694876000 | 1.306617000  |
| C | 4.041943000  | -0.163237000 | 0.293621000  |
| C | 3.448207000  | 0.445835000  | -0.799519000 |
| C | 2.061477000  | 0.511399000  | -0.872751000 |
| C | 1.256295000  | -0.020022000 | 0.123121000  |
| C | 1.870405000  | -0.624792000 | 1.235889000  |
| C | -0.210085000 | 0.043133000  | 0.012409000  |
| C | -0.893519000 | 1.268291000  | -0.043364000 |
| C | -2.310869000 | 1.286554000  | -0.219057000 |

|   |              |              |              |
|---|--------------|--------------|--------------|
| O | -3.013267000 | 0.139885000  | -0.338440000 |
| C | -2.374851000 | -1.069708000 | -0.296256000 |
| C | -0.987534000 | -1.163511000 | -0.116127000 |
| C | -3.185048000 | -2.166029000 | -0.440461000 |
| C | -2.632017000 | -3.508833000 | -0.441652000 |
| C | -1.202643000 | -3.595276000 | -0.283027000 |
| C | -0.438176000 | -2.479126000 | -0.136354000 |
| C | -0.277580000 | 2.542084000  | 0.113400000  |
| C | -0.993604000 | 3.701172000  | 0.059245000  |
| C | -2.387105000 | 3.667028000  | -0.142137000 |
| C | -3.040965000 | 2.455027000  | -0.277919000 |
| O | -3.373209000 | -4.504082000 | -0.576658000 |
| O | -3.024613000 | 4.852900000  | -0.185238000 |
| H | 3.735459000  | -1.155631000 | 2.153943000  |
| H | 5.115701000  | -0.234999000 | 0.381528000  |
| H | 1.610259000  | 0.973022000  | -1.741460000 |
| H | -4.251462000 | -2.039743000 | -0.567180000 |
| H | -0.754422000 | -4.580146000 | -0.290458000 |
| H | 0.632354000  | -2.579771000 | -0.026573000 |
| H | 0.788328000  | 2.581780000  | 0.281238000  |
| H | -0.510720000 | 4.661028000  | 0.182737000  |
| H | -4.112587000 | 2.401003000  | -0.419990000 |
| H | -3.973740000 | 4.735395000  | -0.318885000 |
| O | 1.031481000  | -1.086507000 | 2.200025000  |
| C | 1.590630000  | -1.763892000 | 3.314884000  |
| H | 2.243227000  | -1.104401000 | 3.890567000  |
| H | 0.751163000  | -2.067932000 | 3.933175000  |
| H | 2.149862000  | -2.647694000 | 3.000992000  |
| O | 4.128321000  | 0.994063000  | -1.845158000 |
| C | 5.545576000  | 0.932112000  | -1.826965000 |
| H | 5.879903000  | 1.413340000  | -2.741533000 |
| H | 5.955762000  | 1.466829000  | -0.967400000 |
| H | 5.897455000  | -0.101862000 | -1.813685000 |
